# Supplementary material for: A triphenylcyclopropenylium mass tag: synthesis and application to ultrasensitive LC/MS analysis of amines
Source: Royal Society of Chemistry journal article supplement (doi:10.1039/c5an02642c), 2016-01-01

## Supporting information

### Triphenylcyclopropenylum mass tag: synthesis and application to ultrasensitive LC/MS assay of amines

Artyom P. Topolyan,<sup>a</sup> Dina A. Strizhevskaya,<sup>a</sup> Maria A. Belyaeva,<sup>a</sup> Vladimir A. Brylev,<sup>a</sup> Alexey V. Ustinov,<sup>a,b</sup> Andrey A. Formanovsky,<sup>a</sup> Vladimir A. Korshun<sup>a,c</sup>

<sup>a</sup> Shemyakin-Ovchinnikov Institute of Bioorganic Chemistry, 117997 Moscow, Russian Federation;

<sup>b</sup> Lumiprobe Corp., Hallandale Beach, FL 33009, USA

<sup>c</sup> Gause Institute of New Antibiotics, 119021 Moscow, Russian Federation

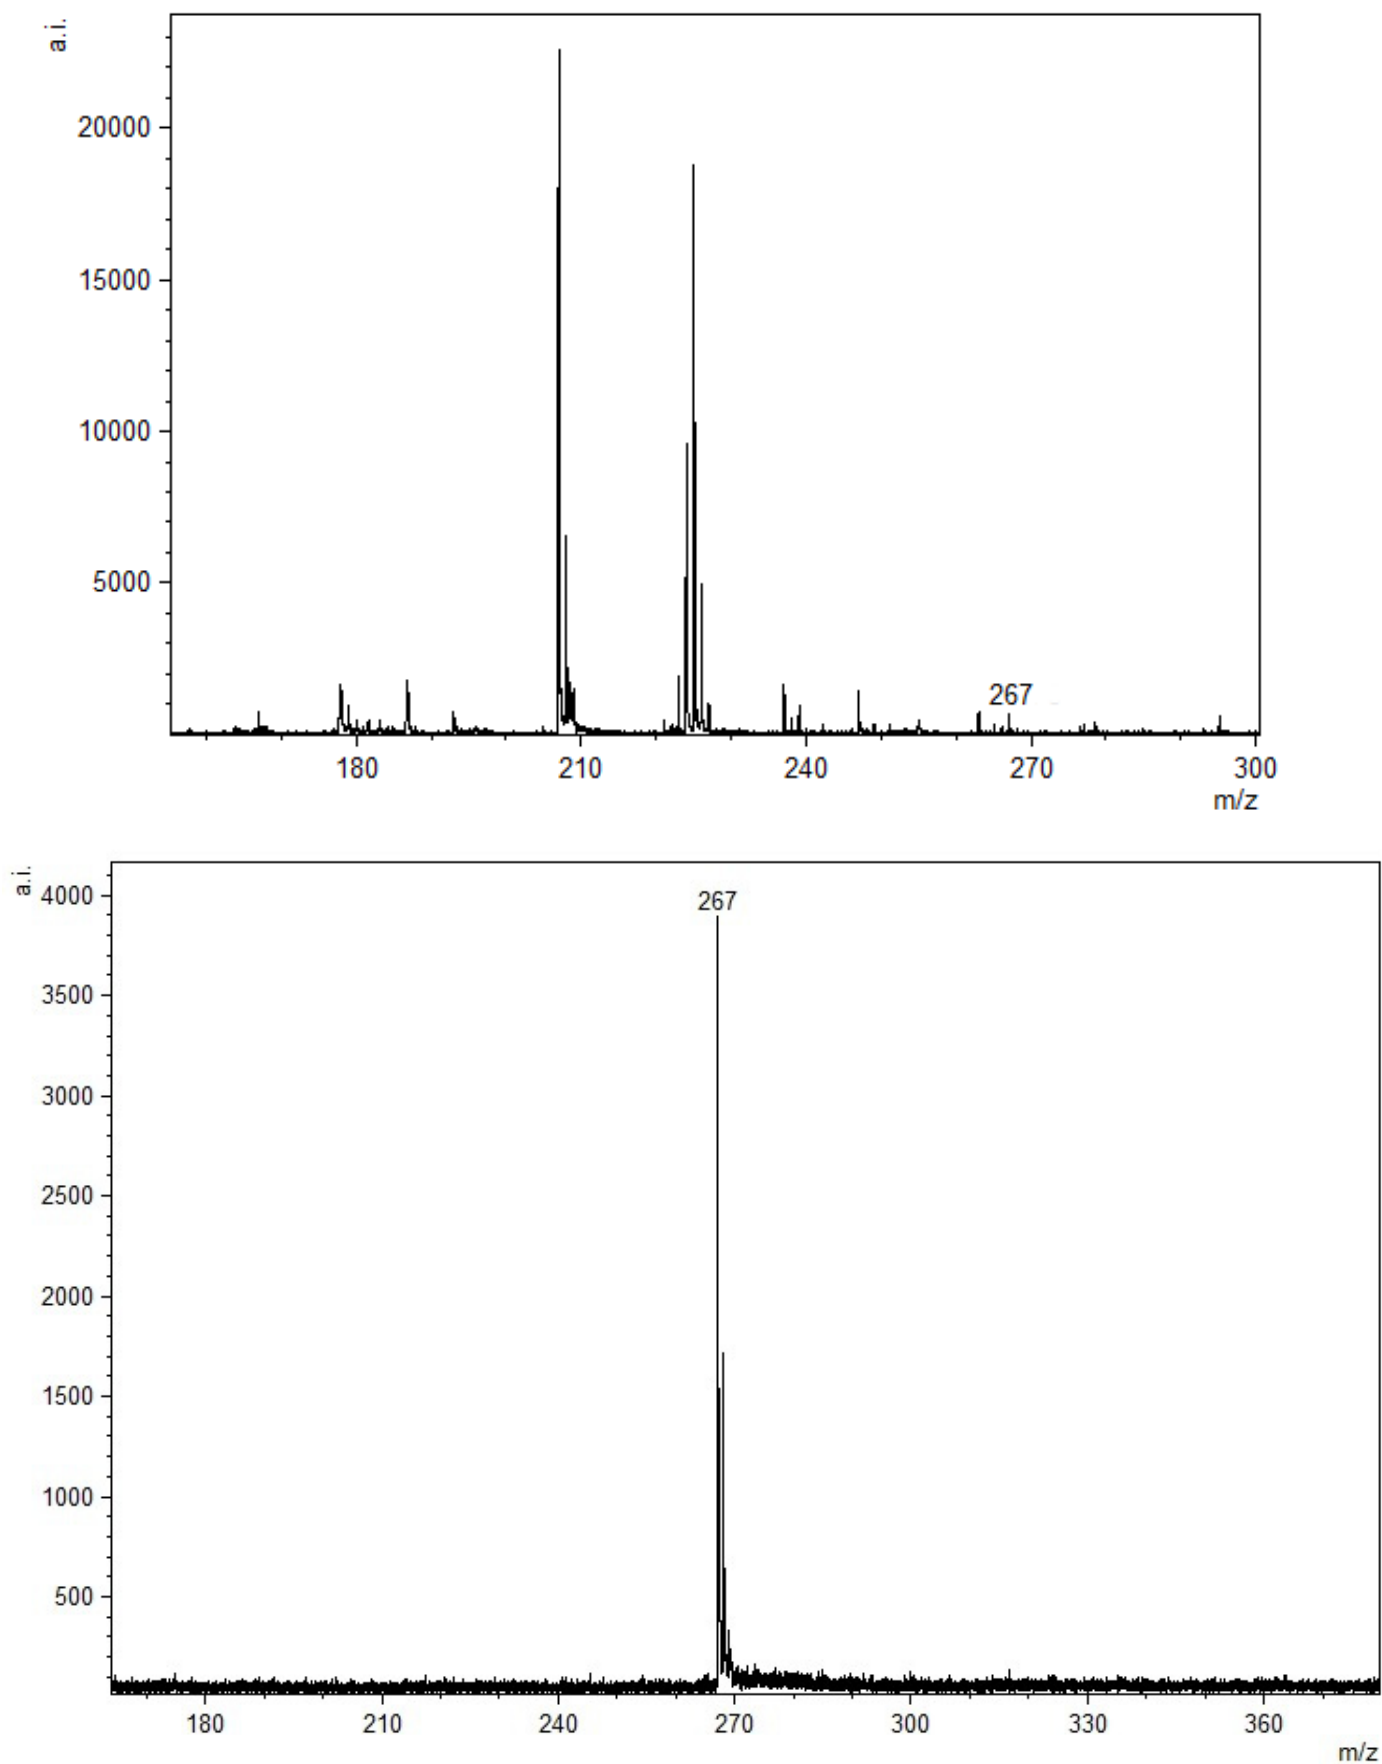

**Figure S1.** Mass spectra of  $1 \cdot \text{BF}_4$ .  $1 \cdot 10^{-11}$  mole per sample spot in MALDI, CHCA matrix (top panel).  $1 \cdot 10^{-9}$  mole per sample spot in LDI (bottom panel).

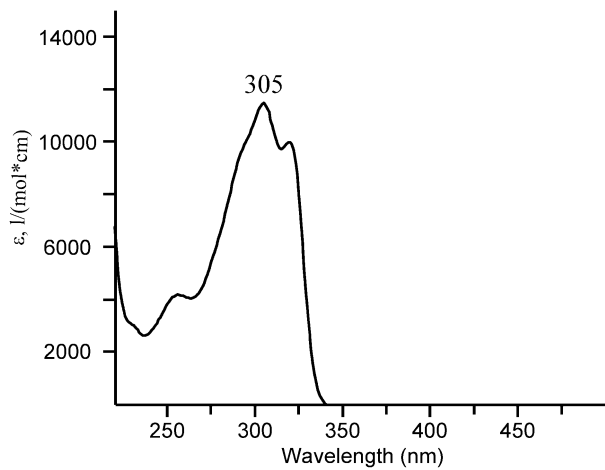

Compound **1** (0.1 · 10<sup>-4</sup> M in MeCN)

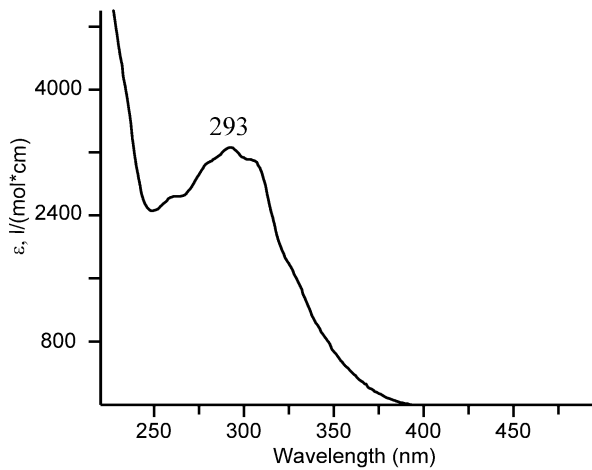

Compound **4a** (0.9 · 10<sup>-4</sup> M, MeCN)

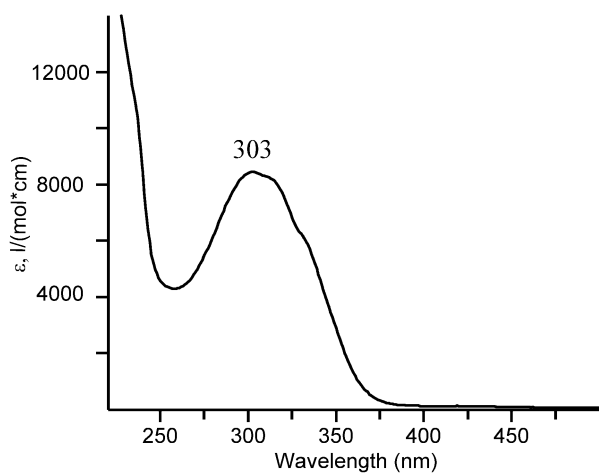

Compound **4i** (0.5 · 10<sup>-4</sup> M in MeCN)

**Figure S2.** UV spectra of selected compounds.

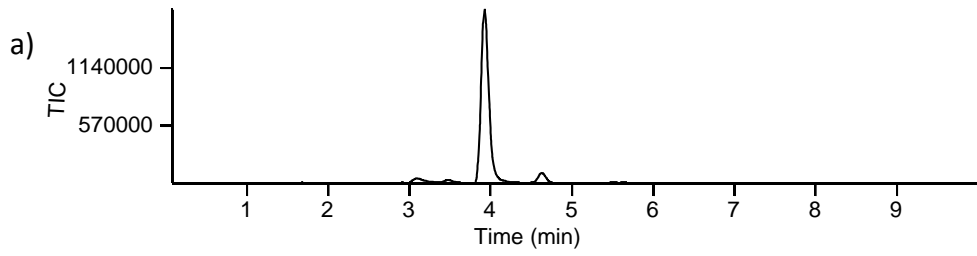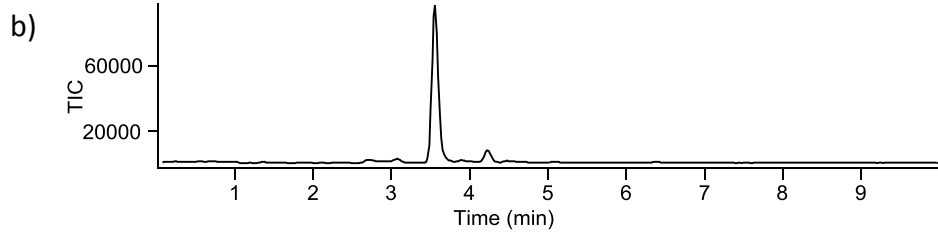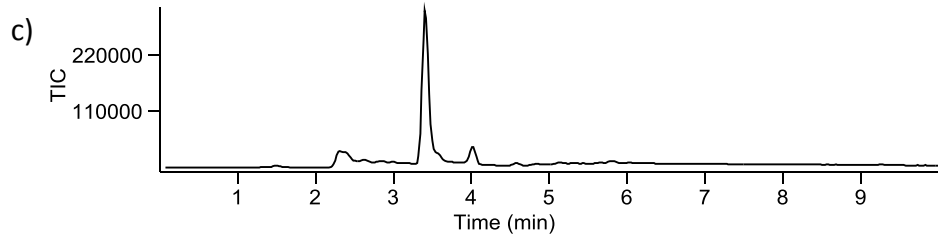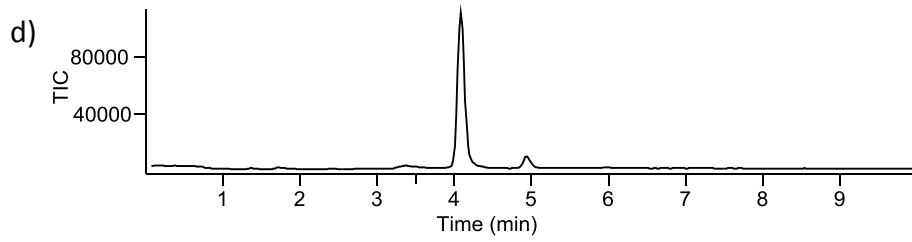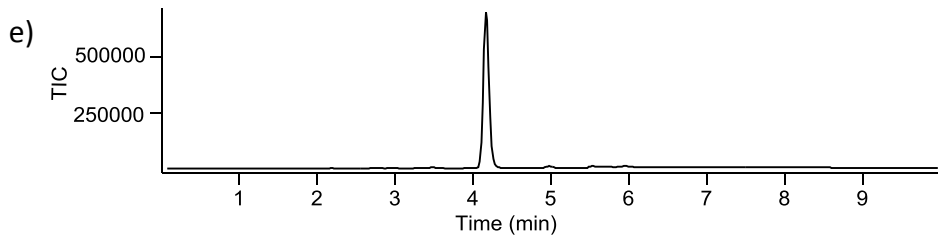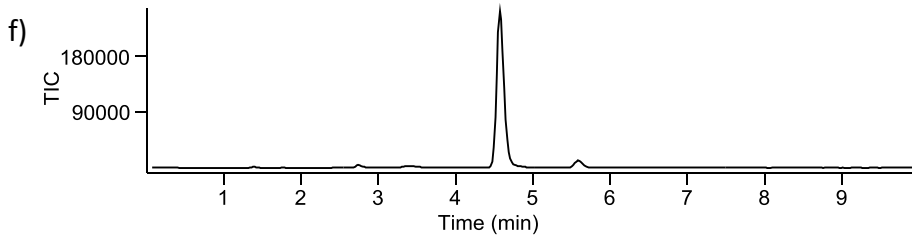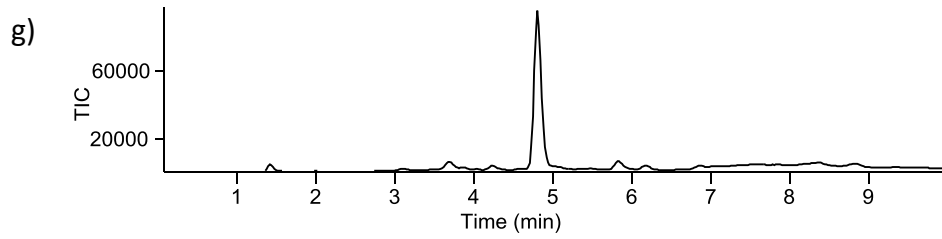

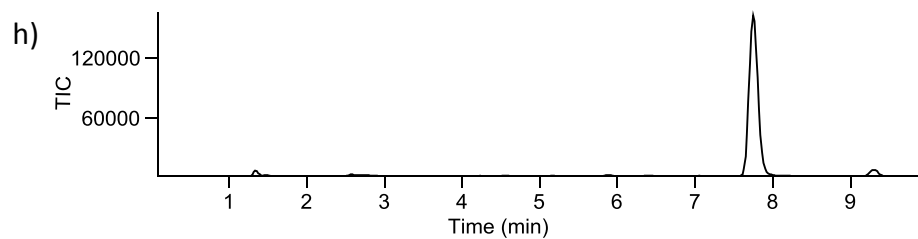

**Figure S3.** Single-ion mode ( $m/z = 267$ ) HPLC/ESI-MS analysis of amides **8** prepared in situ by quenching of MeCN solution of **7** (a) by an excess of ammonia (b),  $\text{HO}(\text{CH}_2)_4\text{NH}_2$  (c), isopropylamine (d), benzylamine (e), pyrrolidine (f), 1-pentylamine (g), 1-decylamine (h); ca. 4 pmol of **8** per sample.

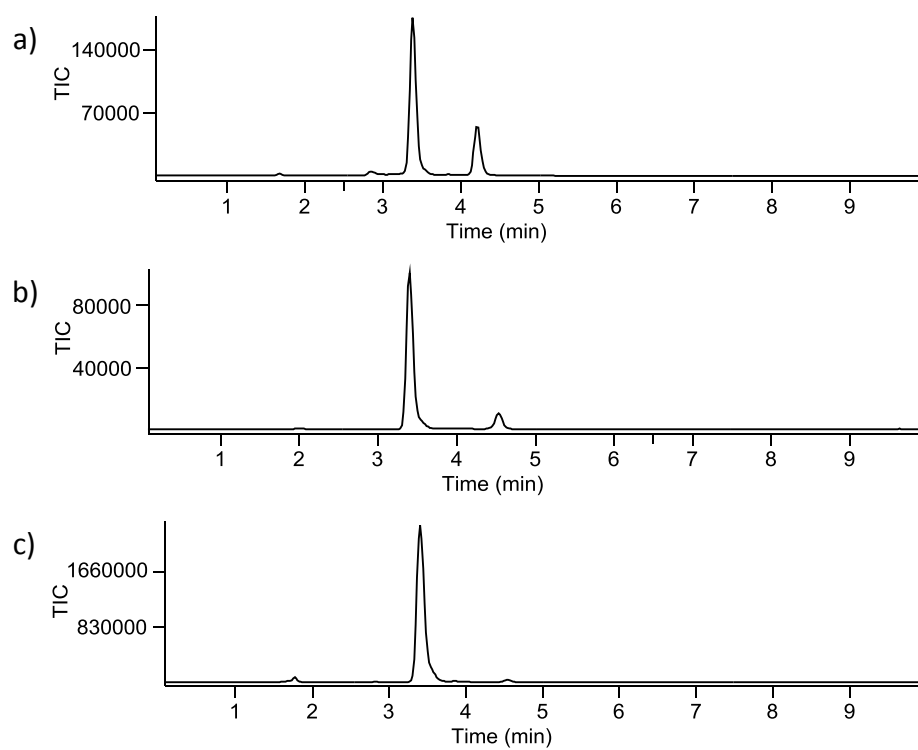

**Figure S4.** Single-ion mode ( $m/z = 267$ ) HPLC/ESI-MS profile of pairs of compounds 8,  $R = (\text{CH}_2)_4\text{OH}$  and  $R = n\text{-C}_3\text{H}_7$ , 3:1 ratio (a);  $R = (\text{CH}_2)_4\text{OH}$  and  $R = n\text{-C}_4\text{H}_9$ , 10:1 ratio (b), 100:1 ratio (c).

## NMR spectra of synthesized compounds

Triphenylcyclopropenylum tetrafluoroborate (**1**·BF<sub>4</sub>)

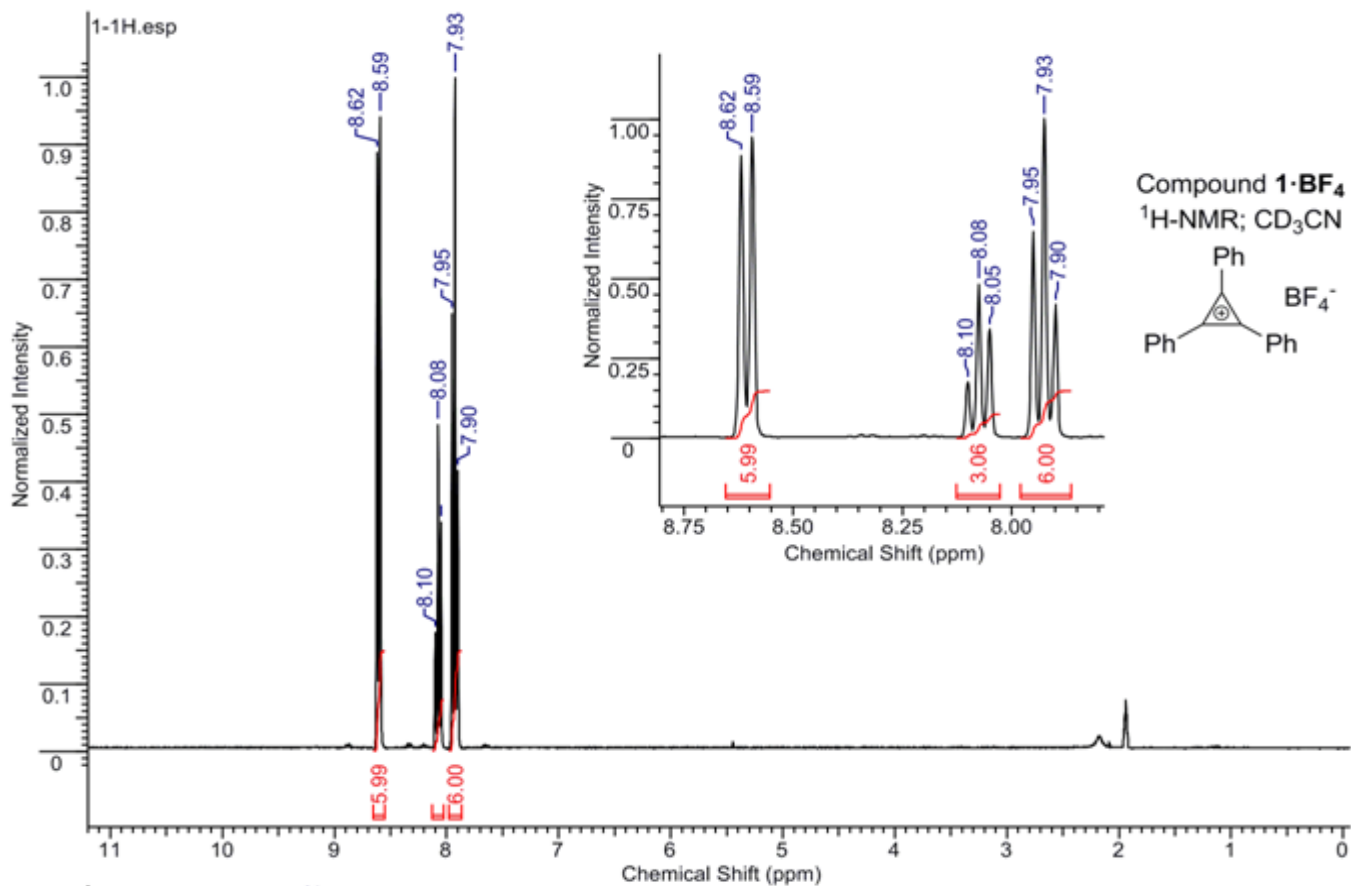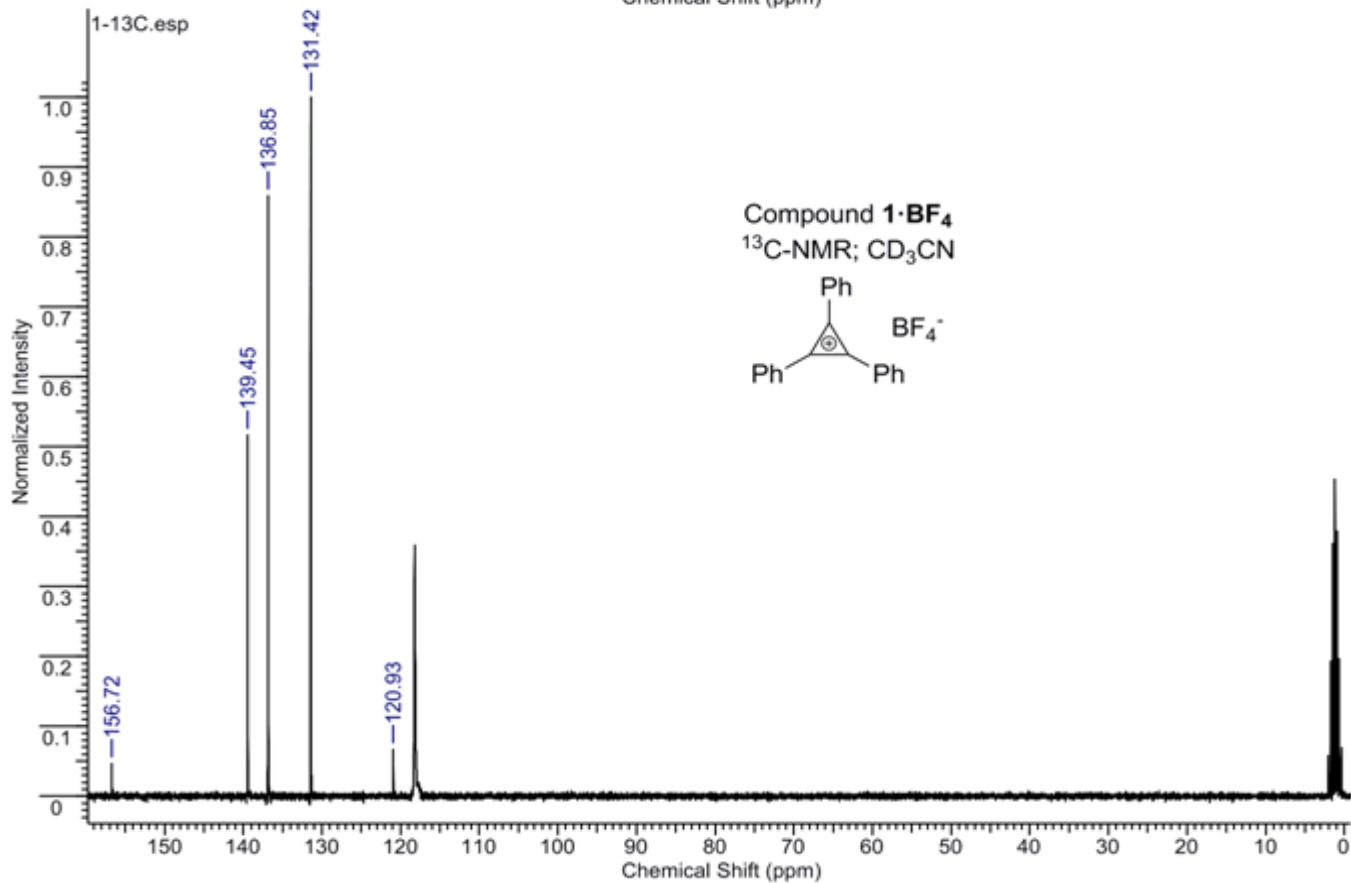

N-(Triphenylcyclopropen-3-yl)morpholine (**4a**)

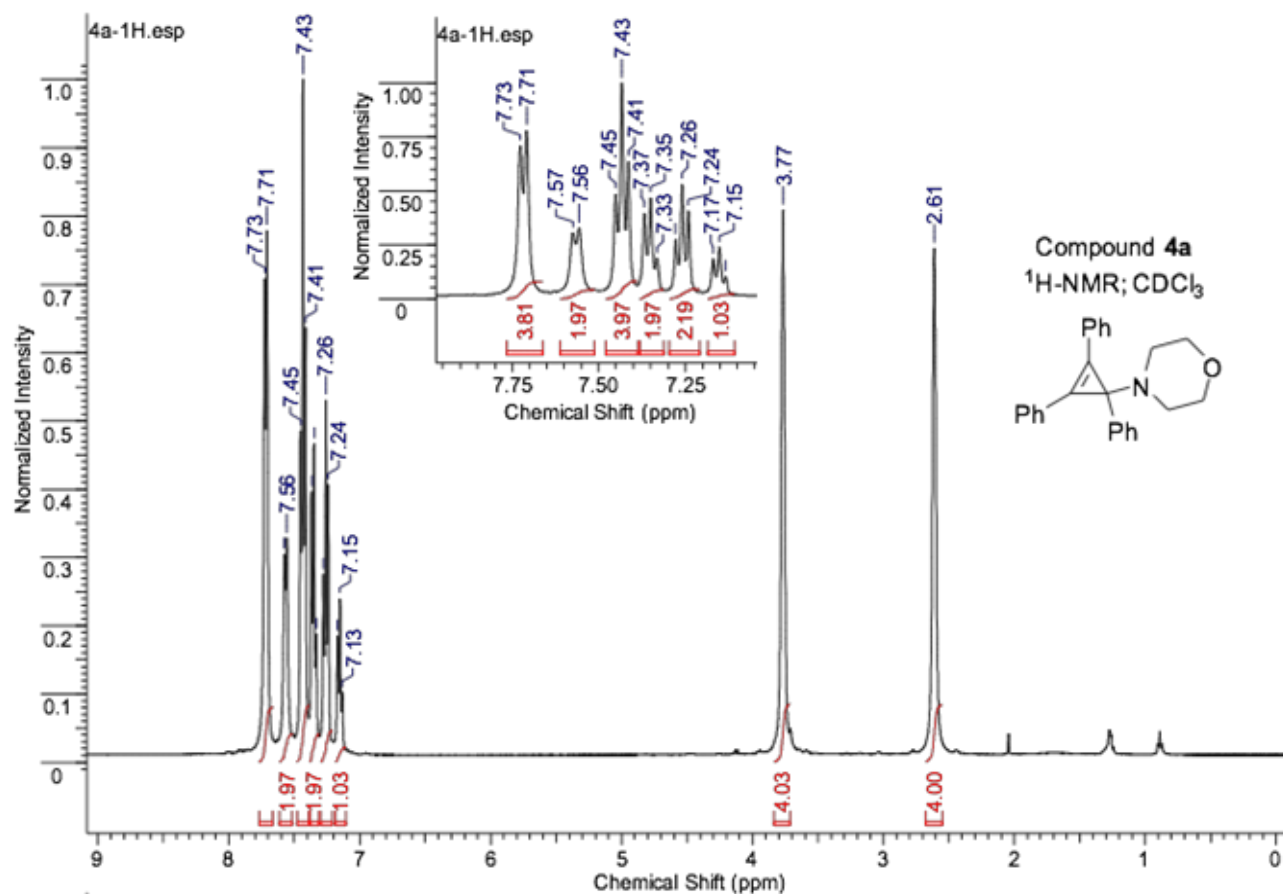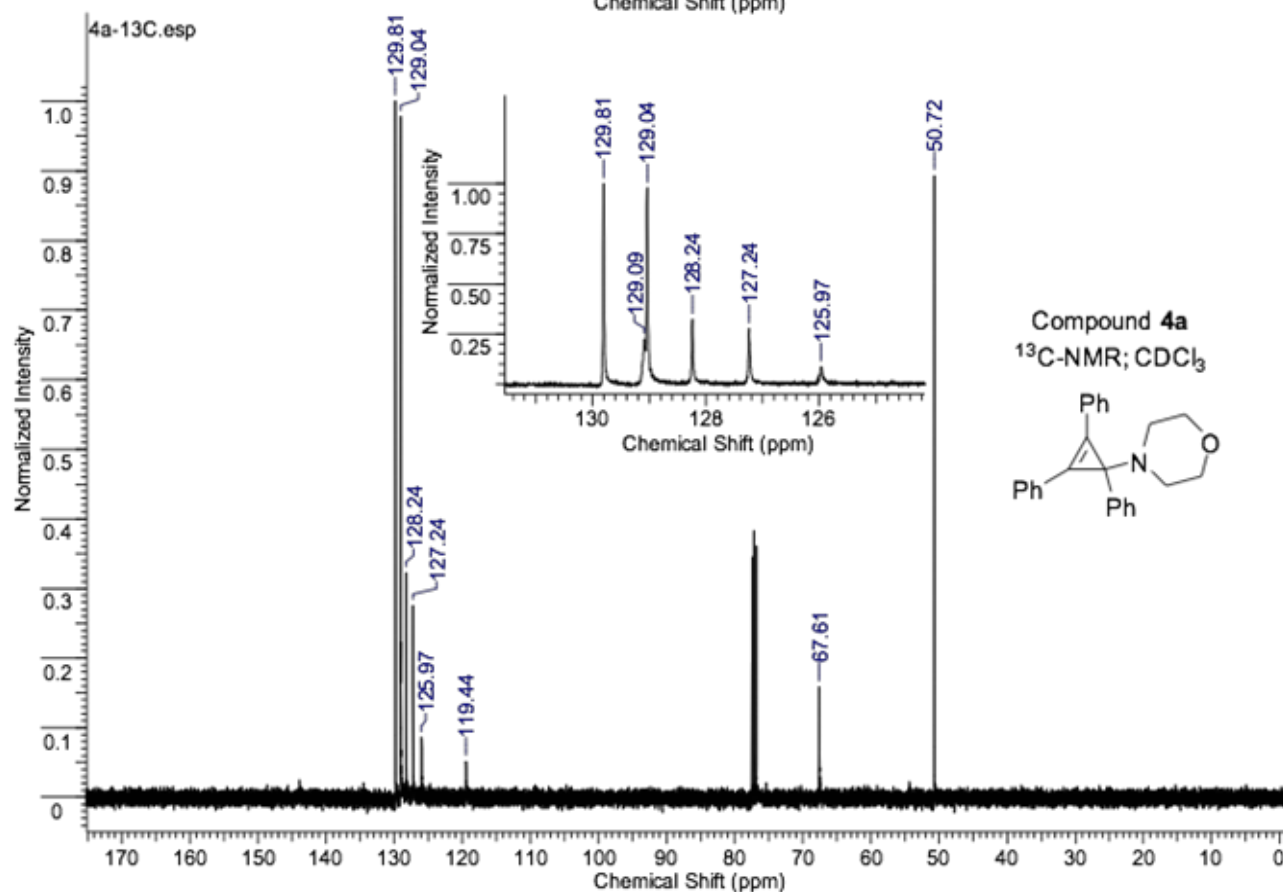



3-(Triphenylcyclopropen-3-yl)-pentane-2,4-dione (**4b**)

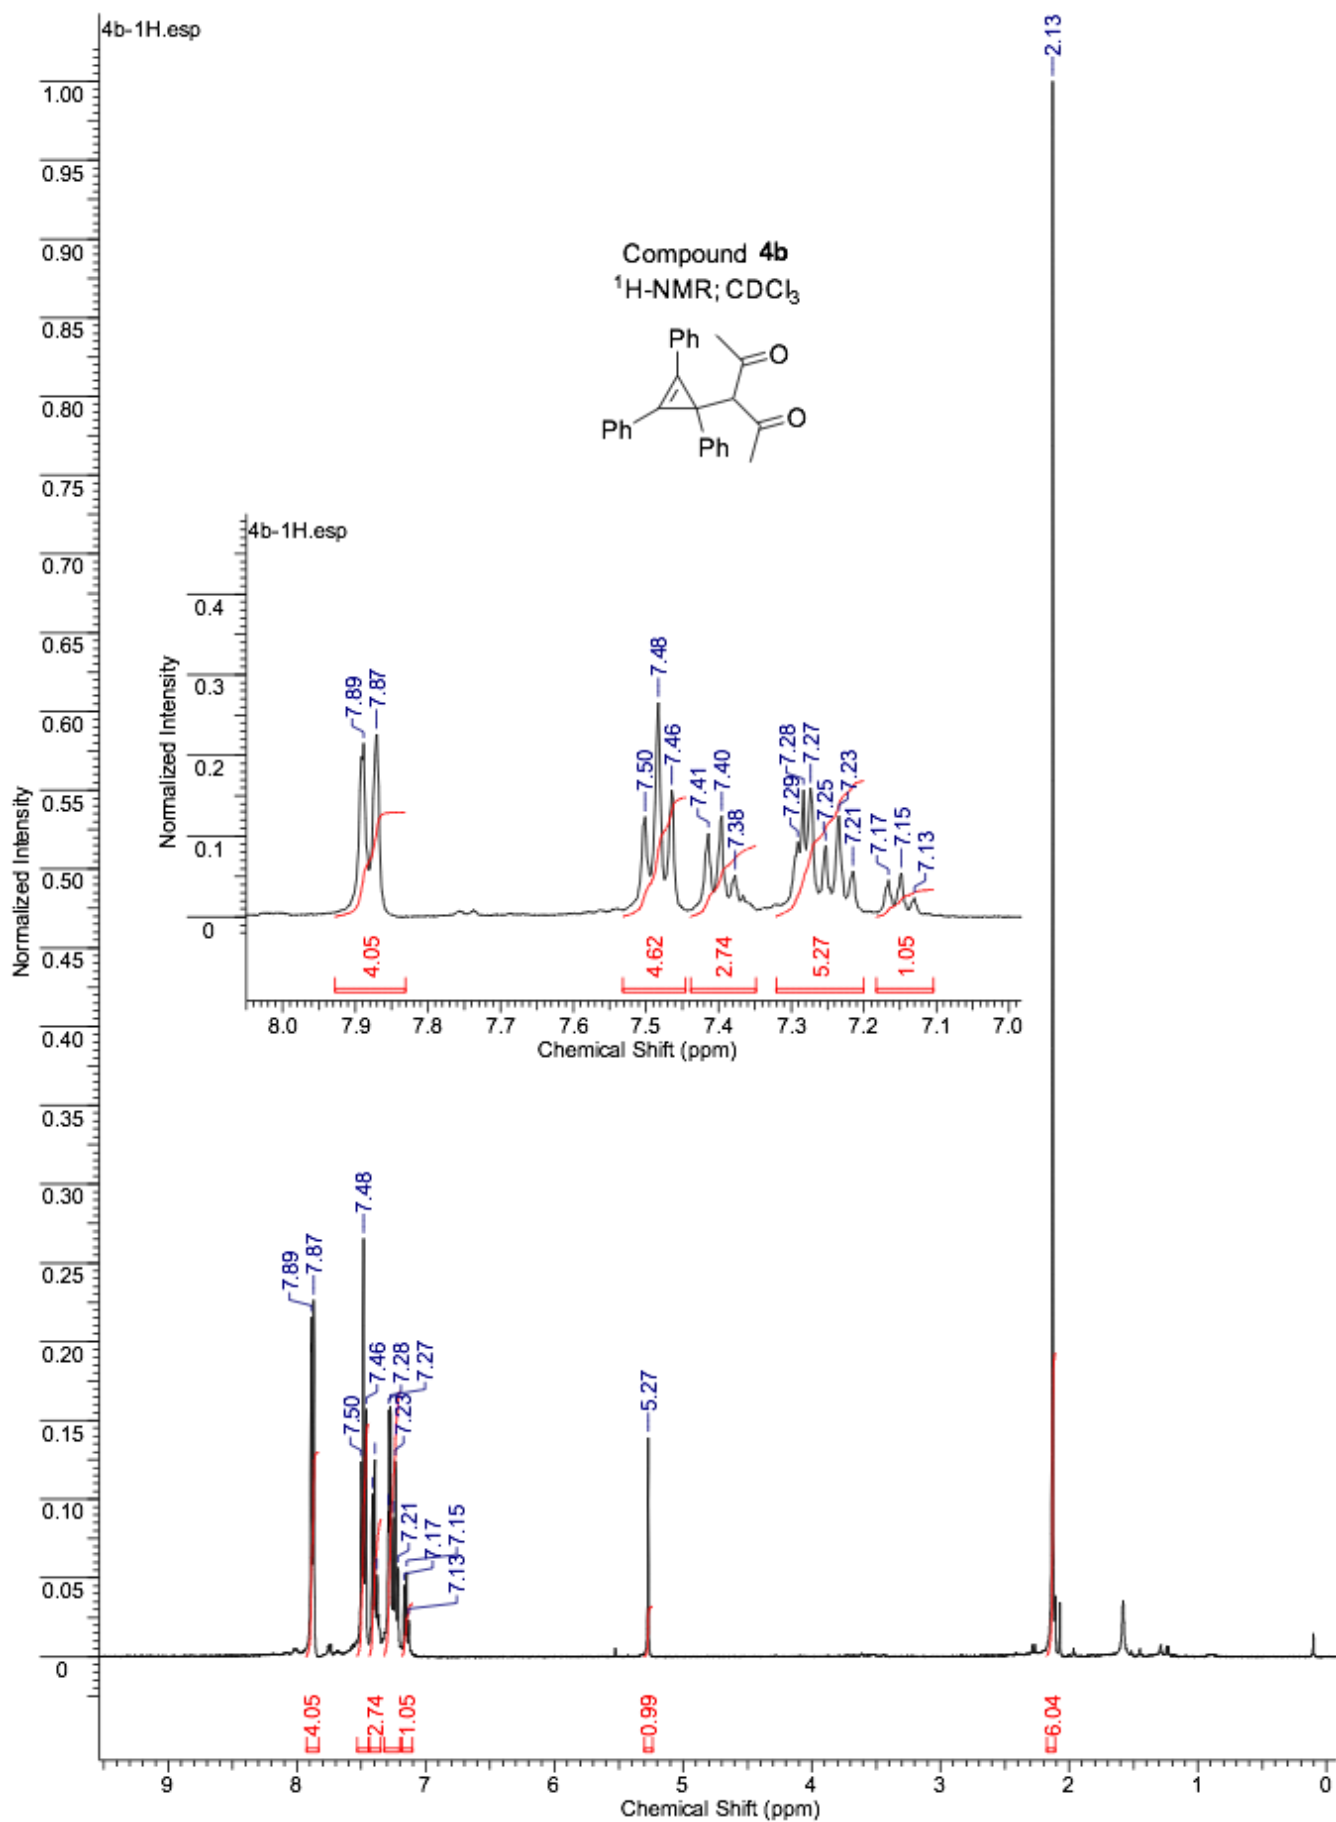

Ethyl 2-(Triphenylcyclopropen-3-yl)acetoacetate (**4c**)

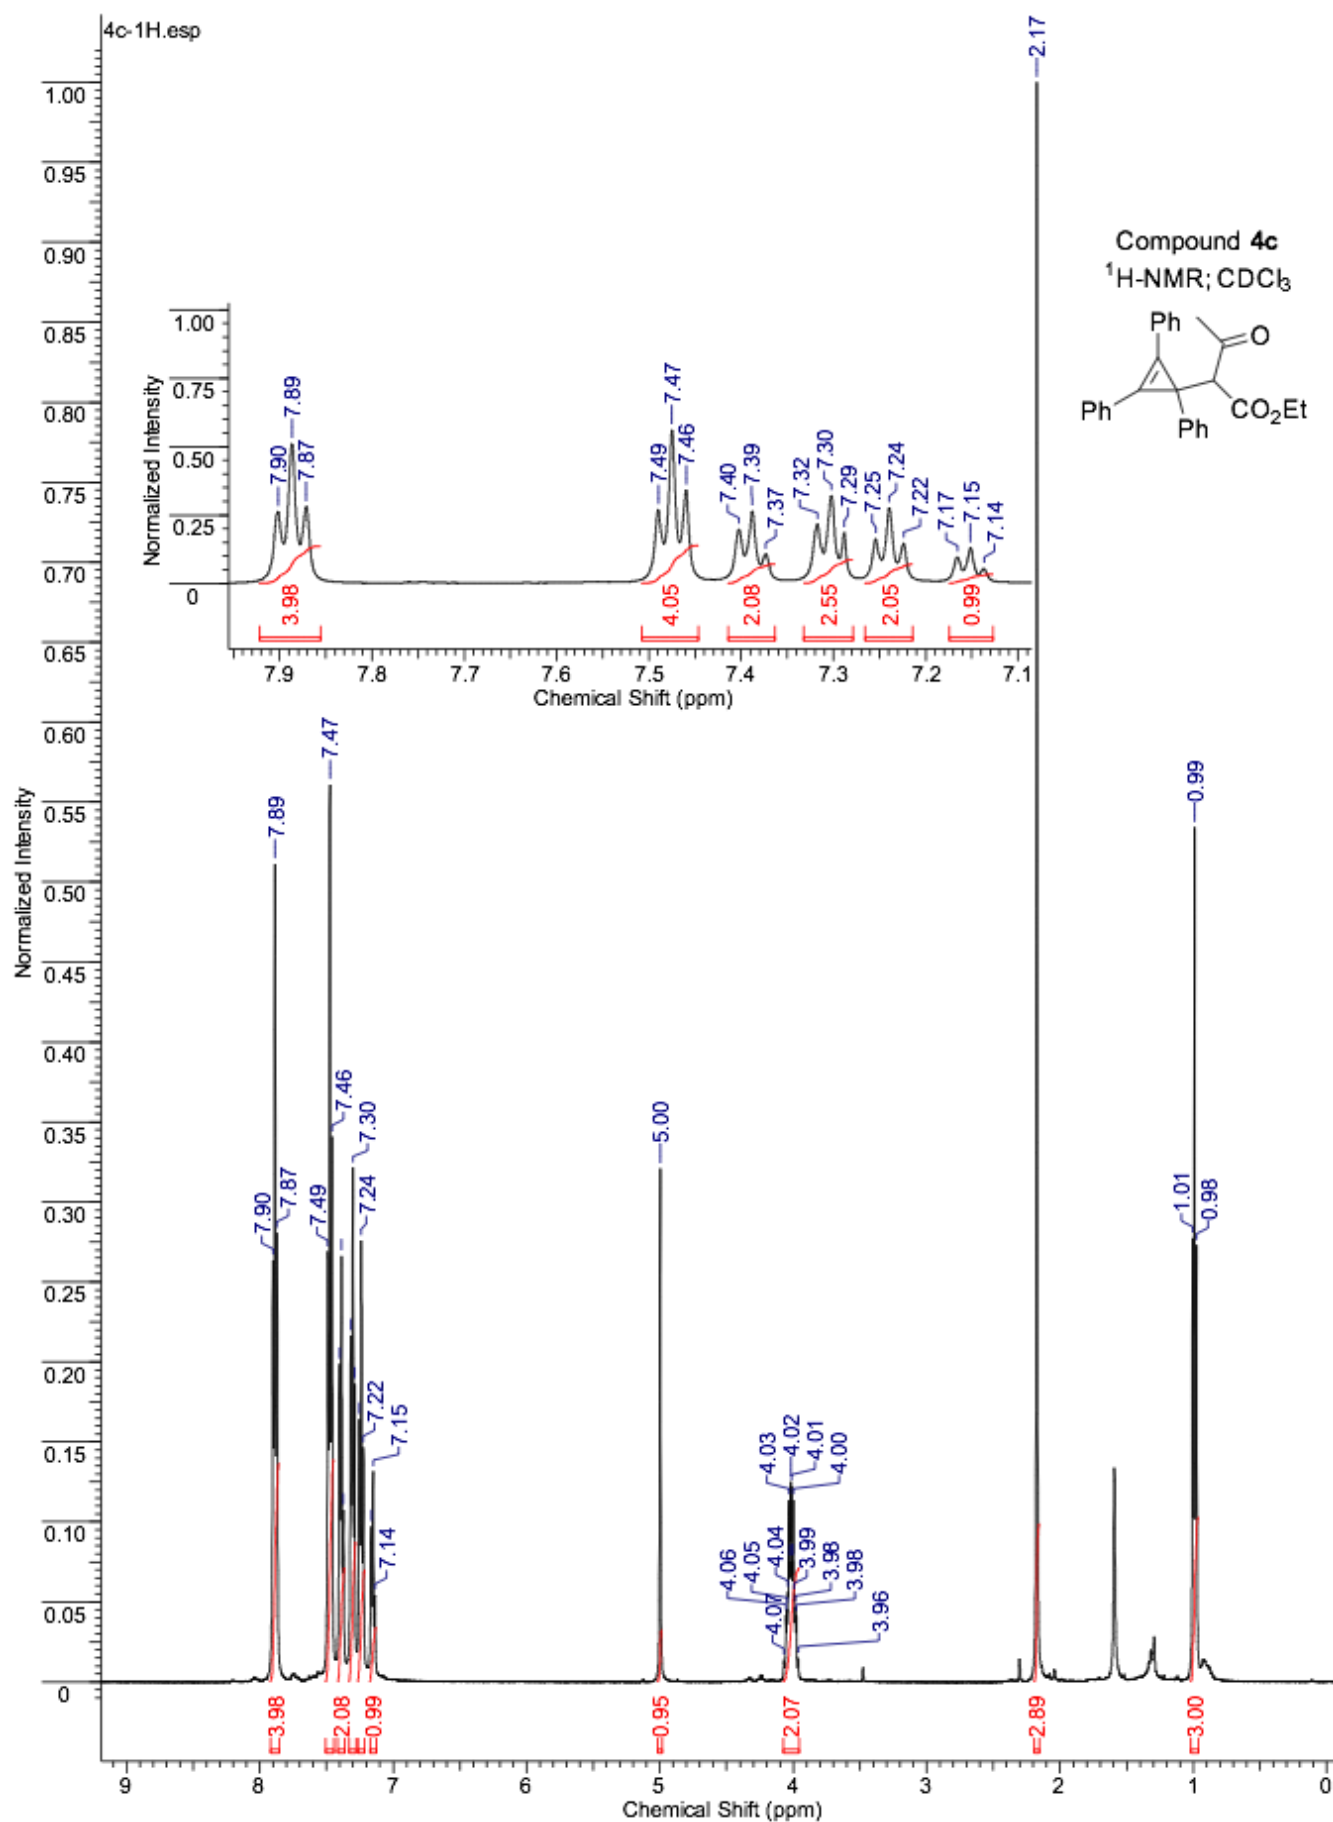

Ethyl 2-(Triphenylcyclopropen-3-yl)cynoacetate (**4d**)

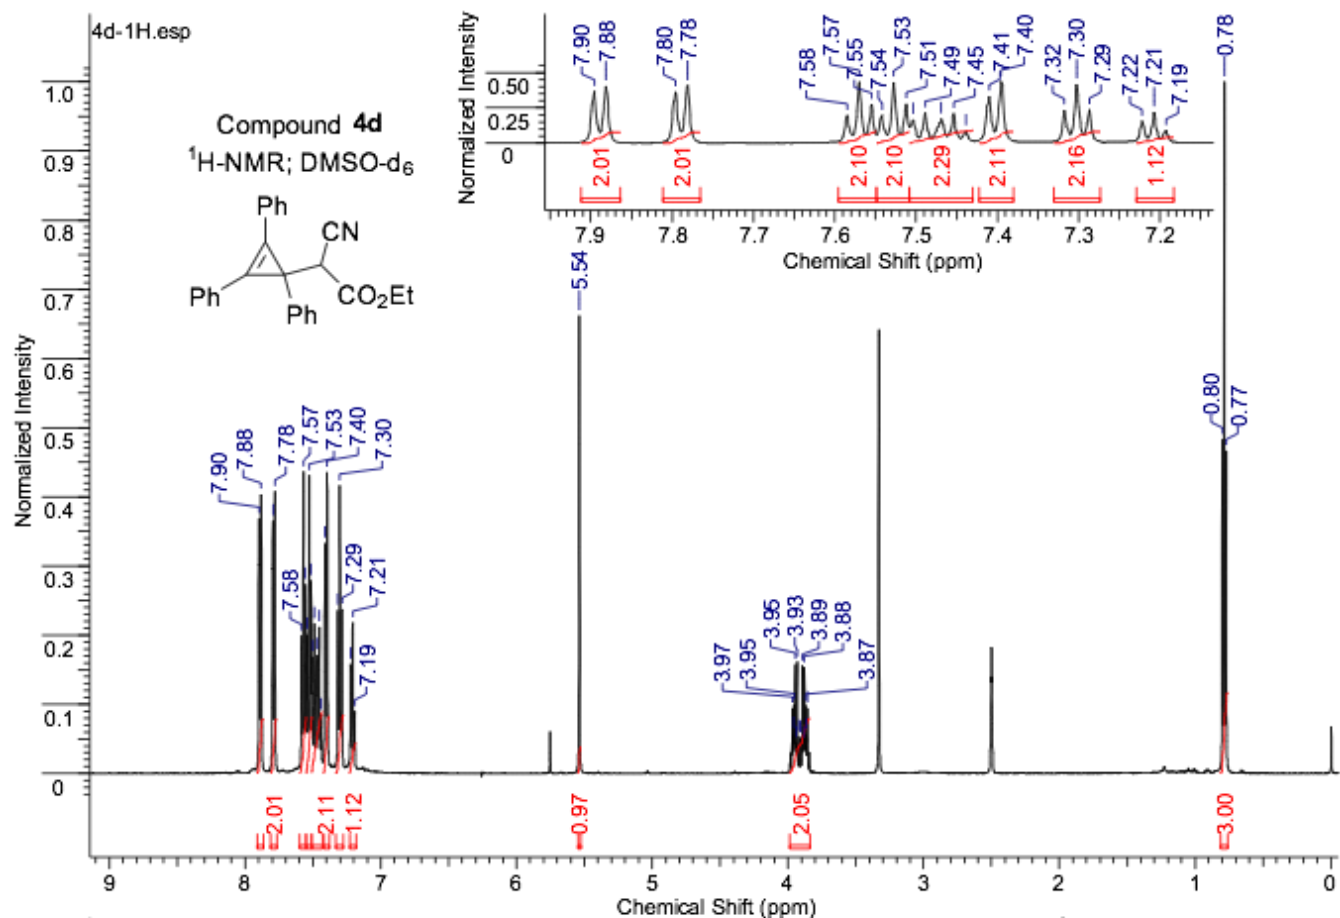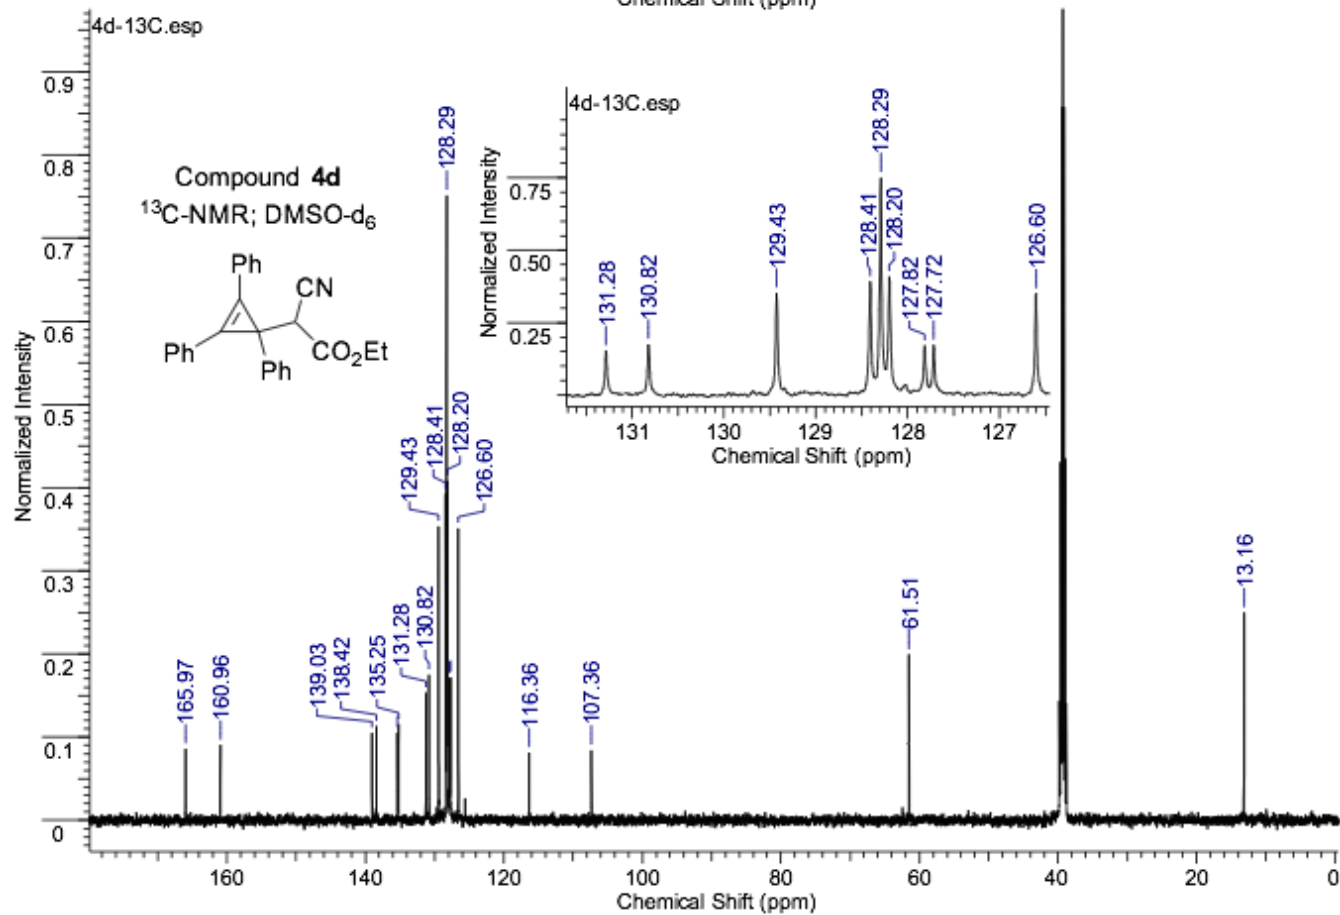

N-Phenyl-2-(triphenylcyclopropen-3-yl)acetamide (**4e**)

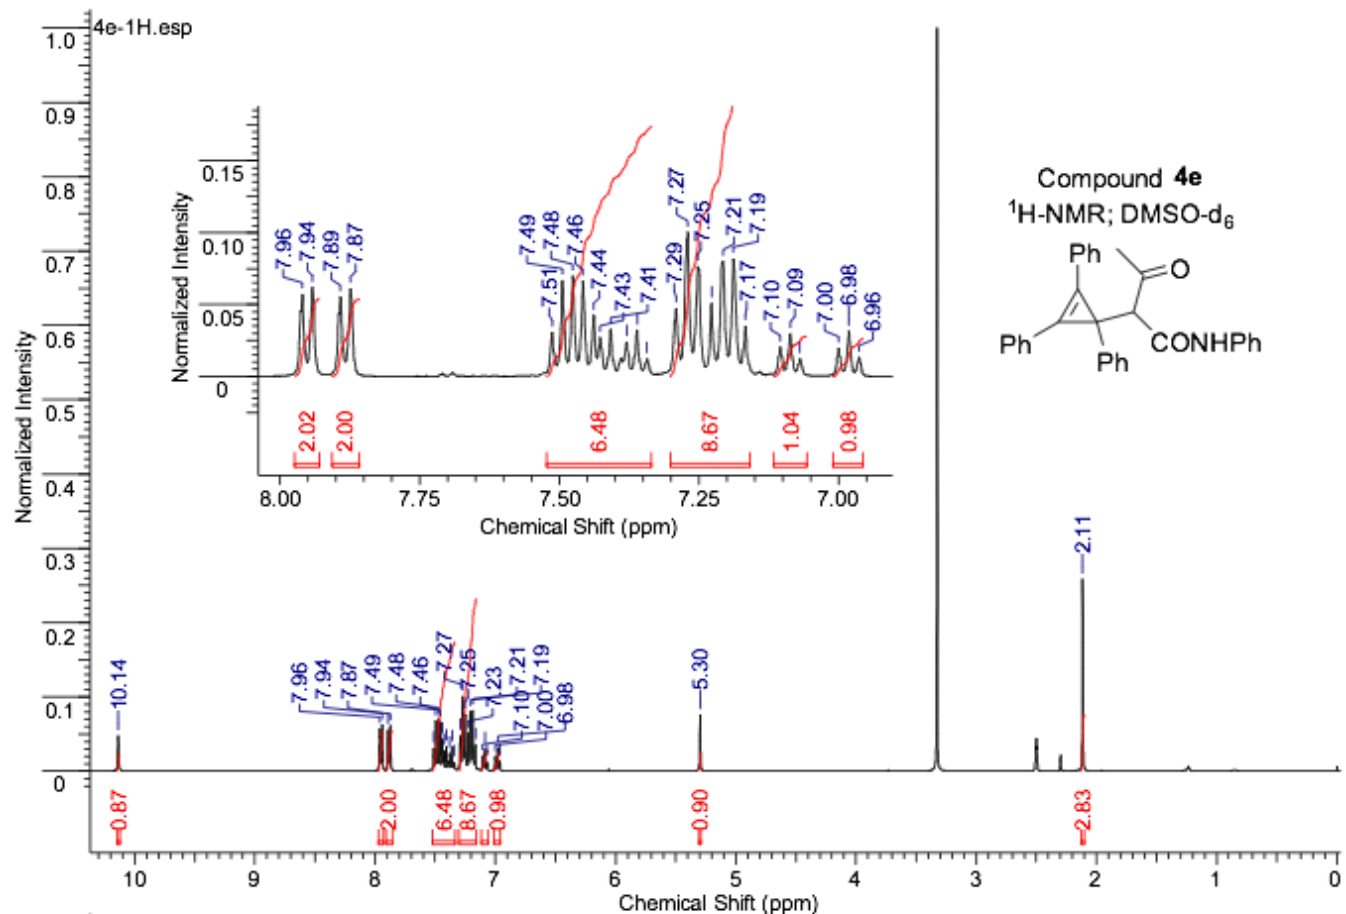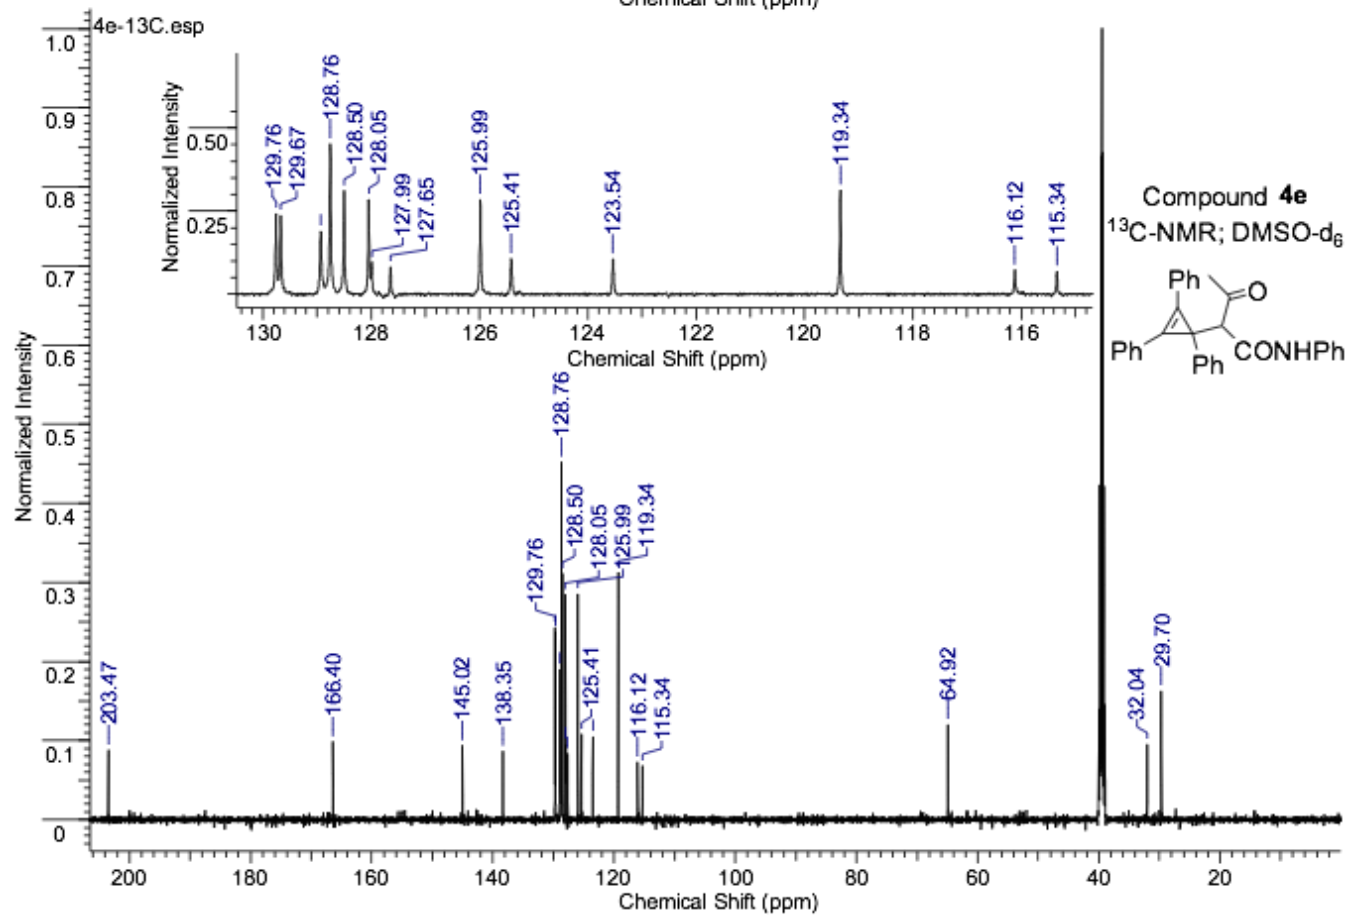

*N*-(2-Hydroxyethyl)-2-(triphenylcyclopropen-3-yl)acetamide (**4f**)

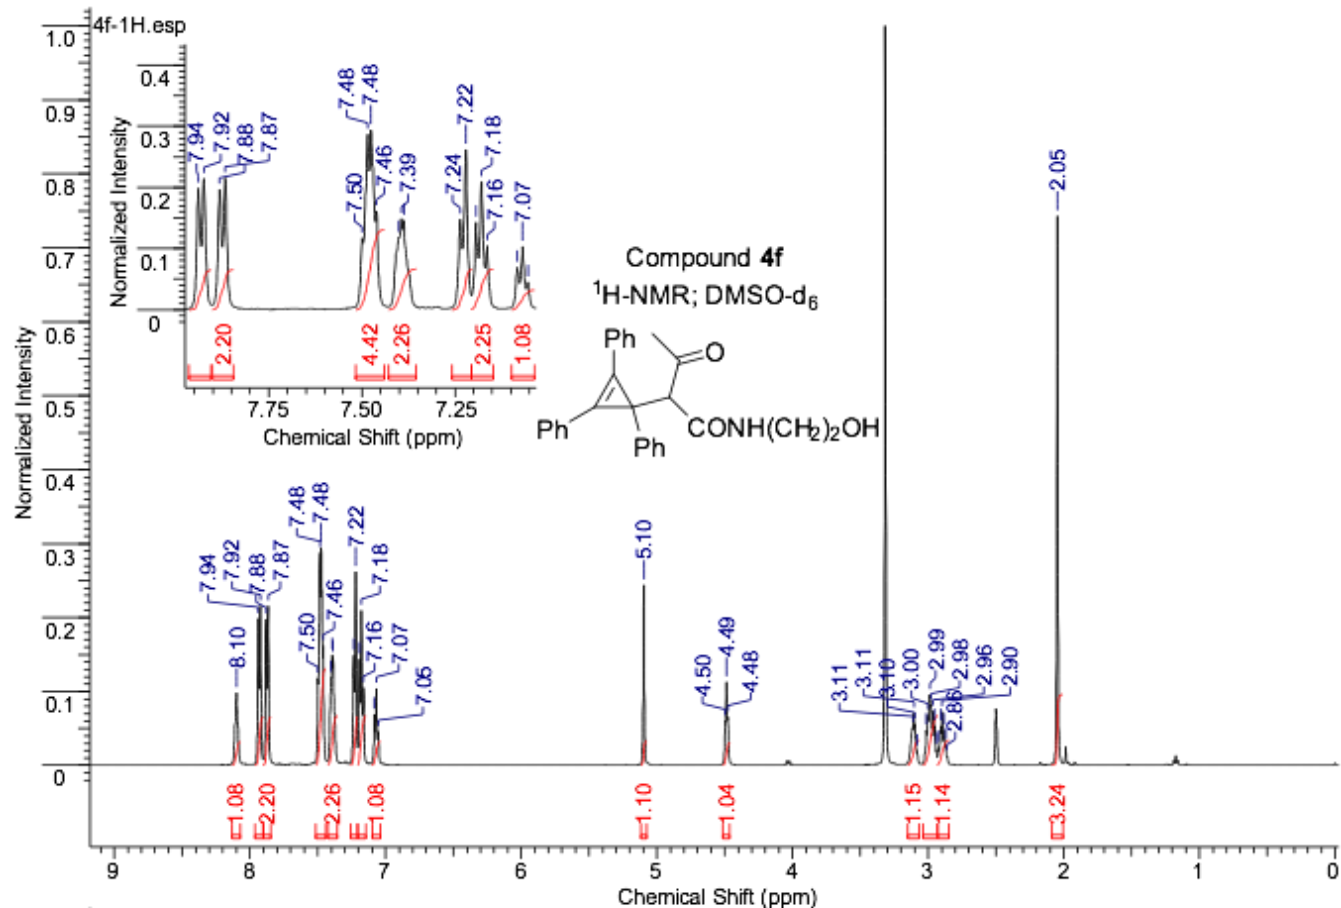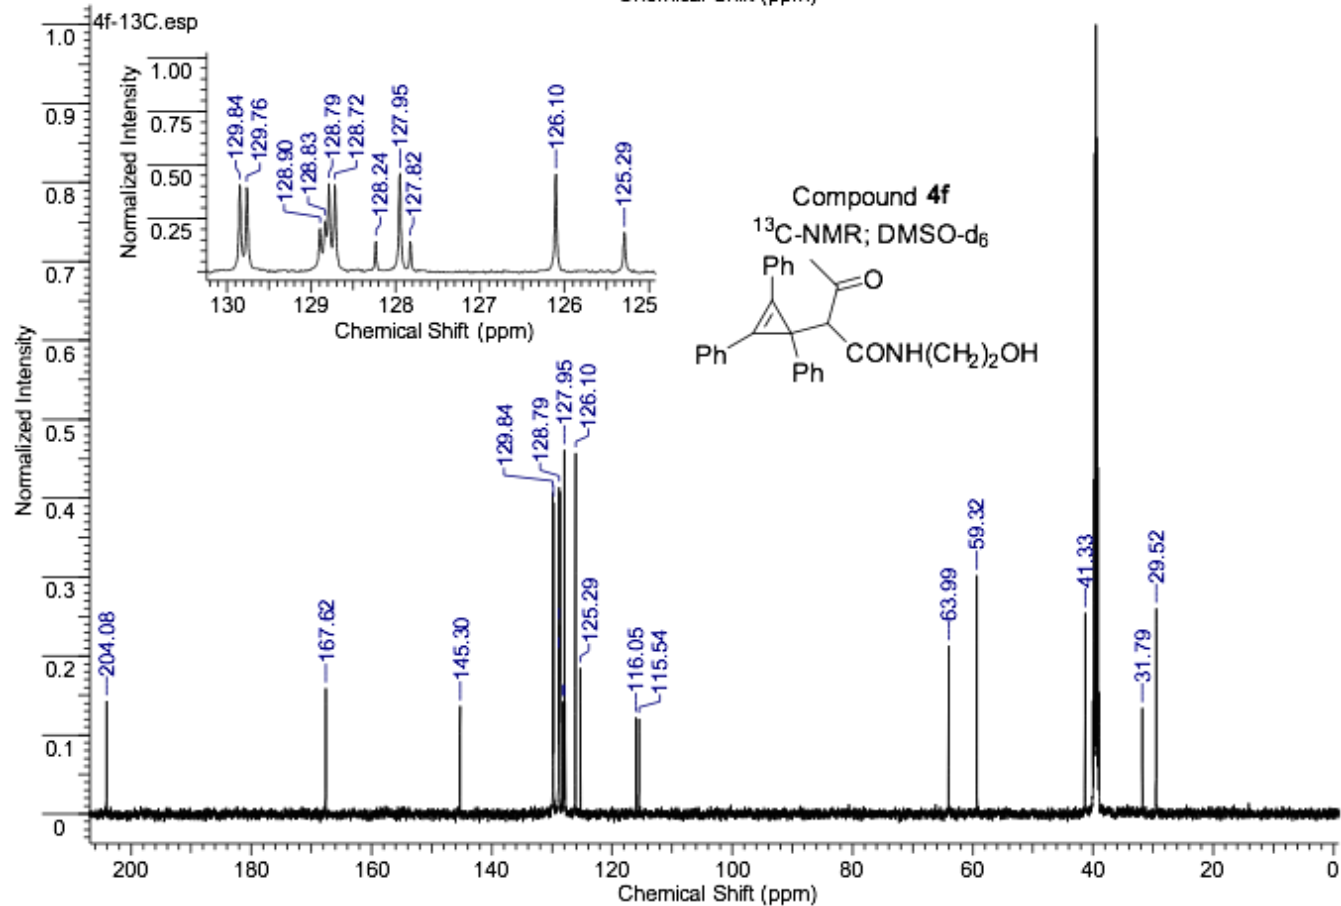



Triphenylcyclopropenyl ethoxyxanthate (**4h**)

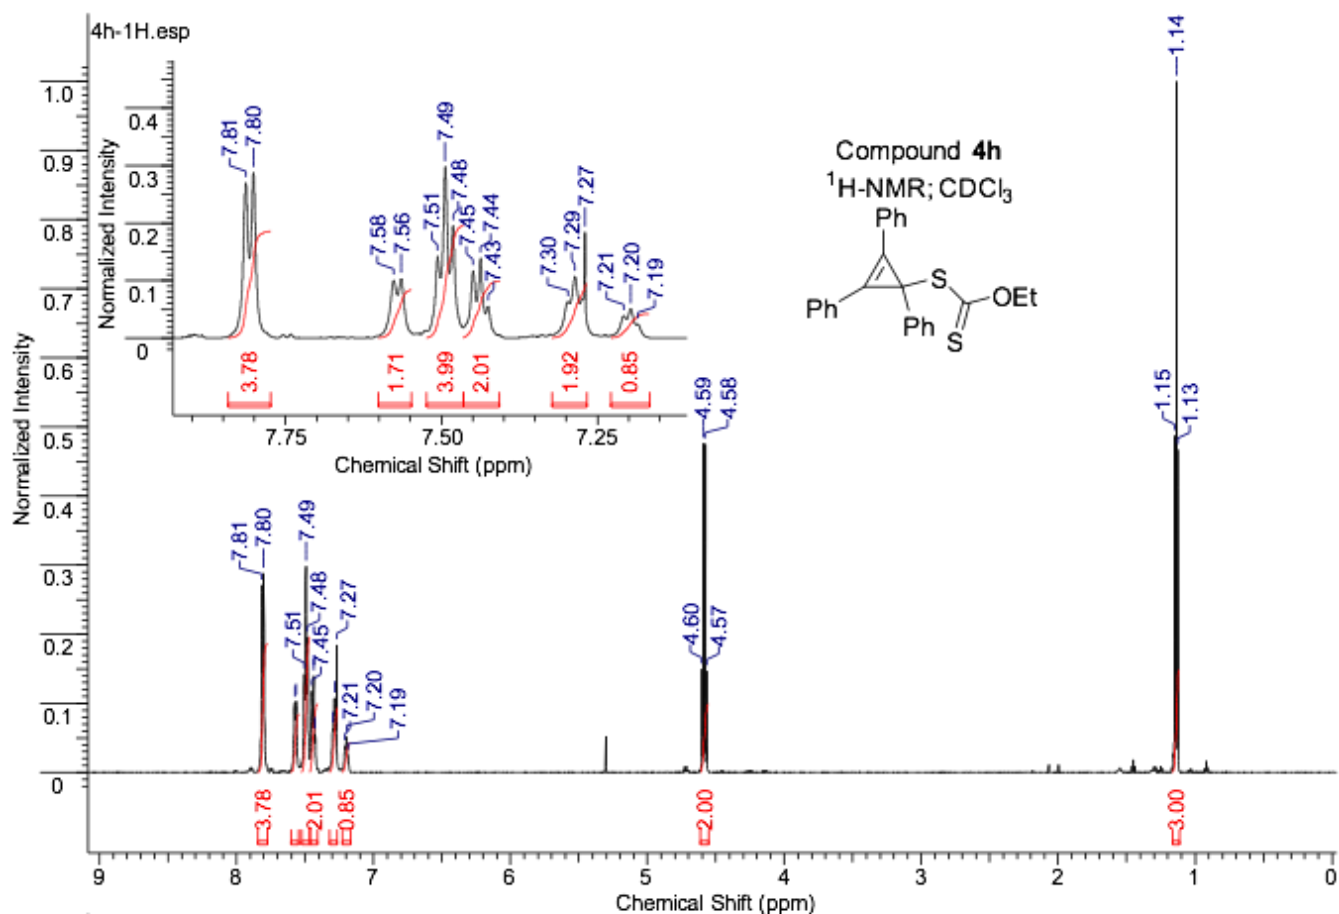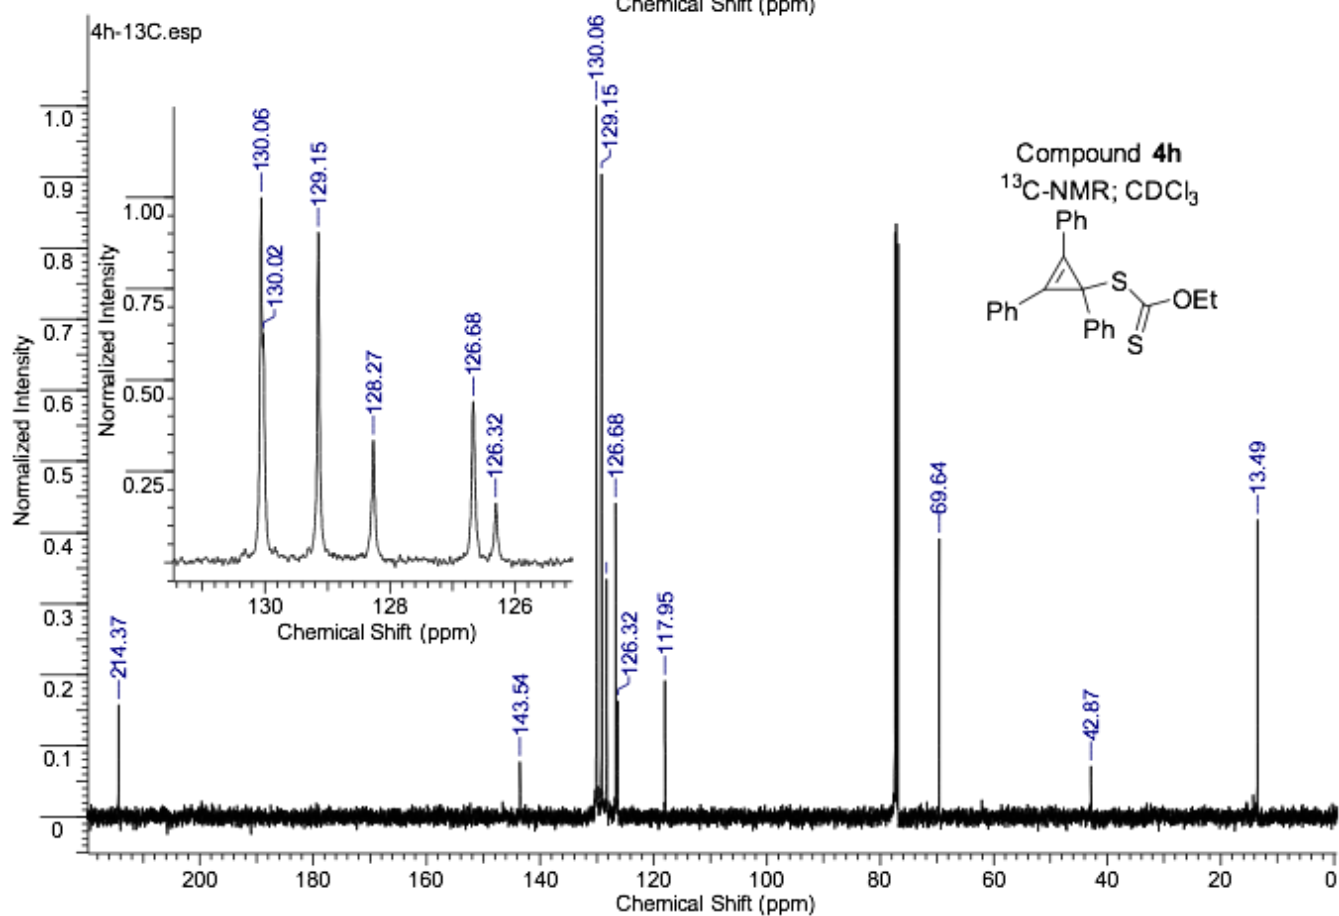



6-(Triphenylcyclopropen-3-ylthio)hexanoic acid (**4i**)

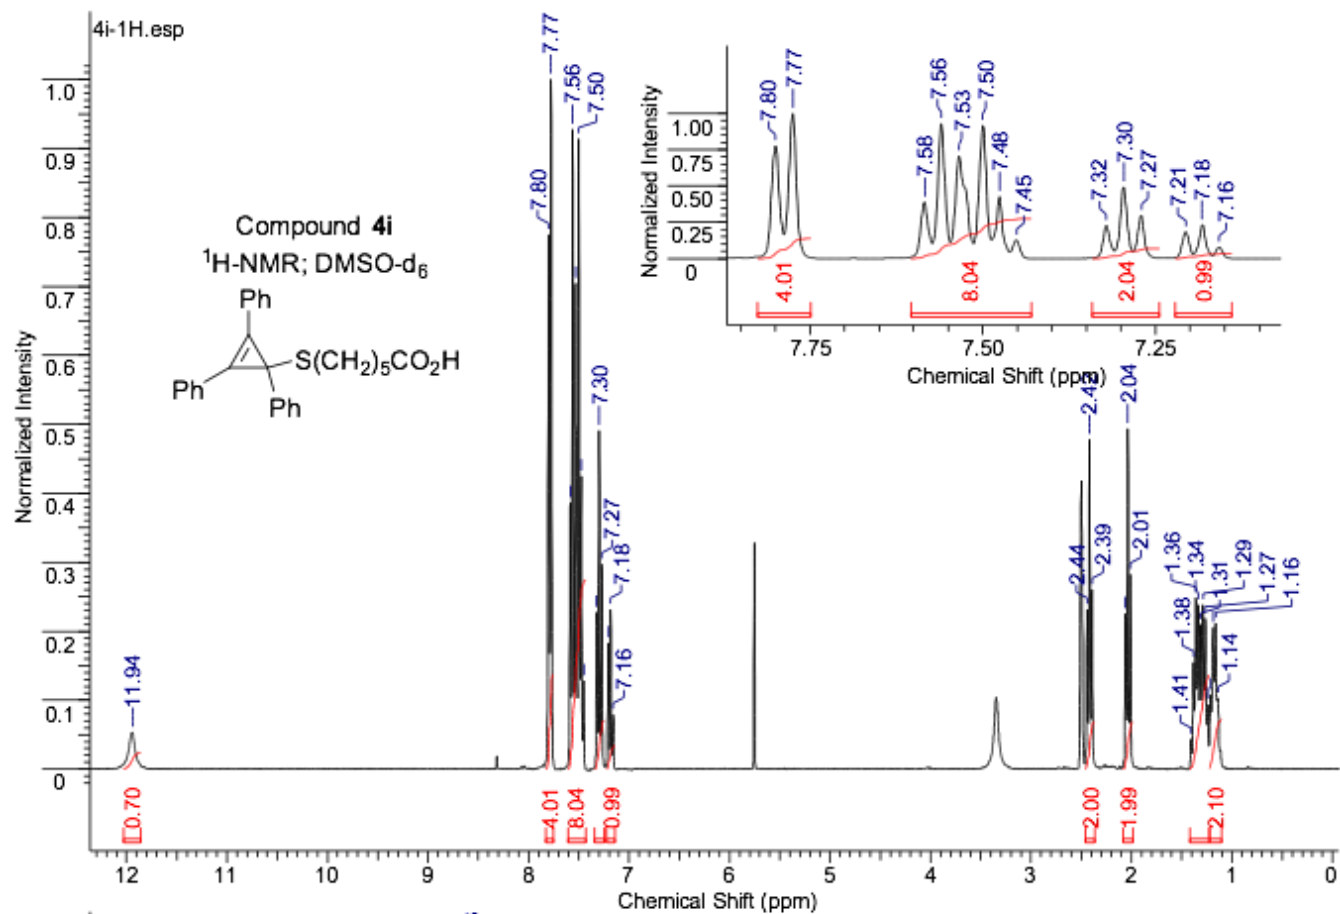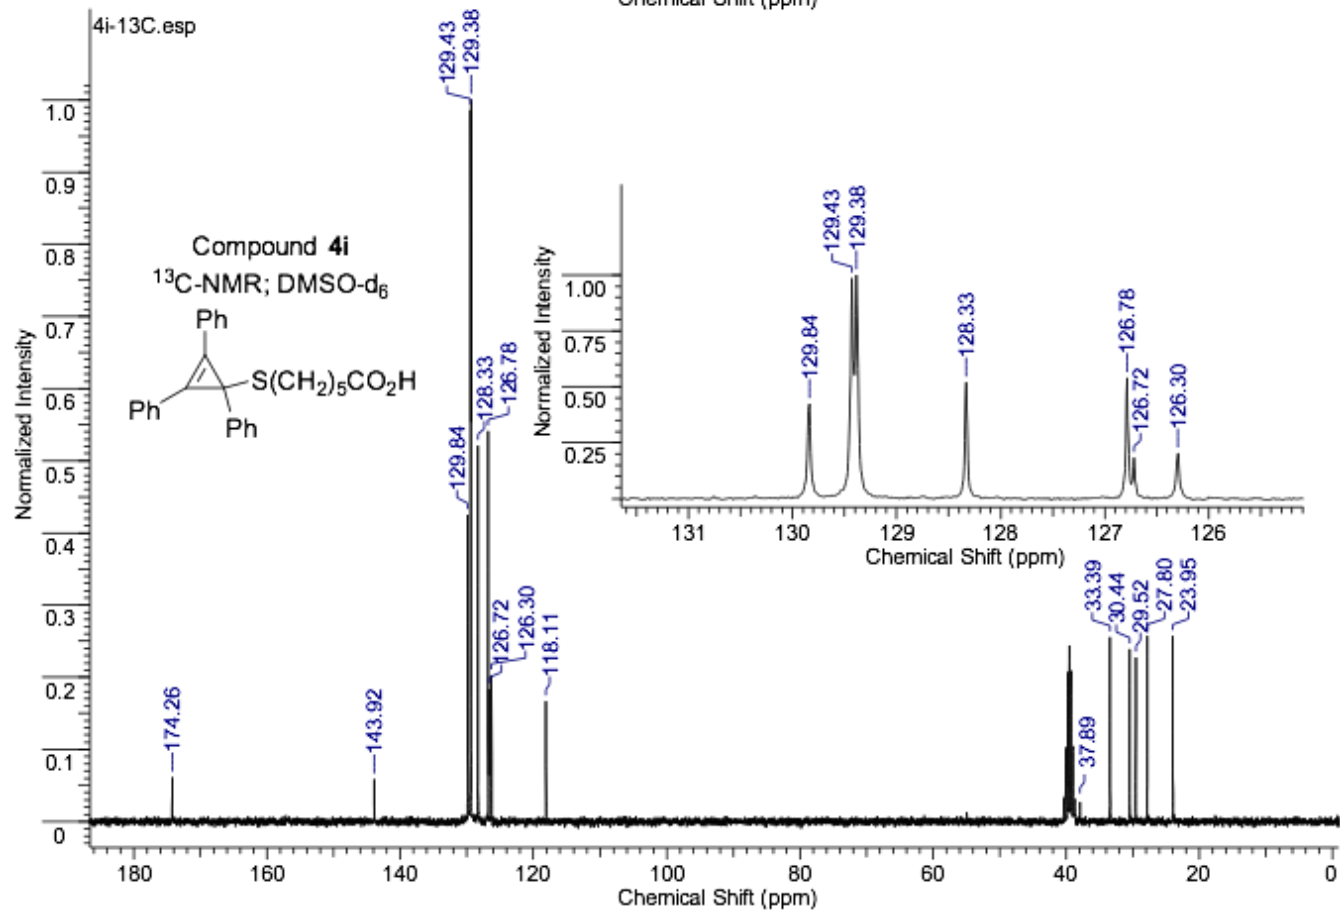





Benzyl-[1,2,3-triphenylprop-2(E)-en-1-ylidene]amine (**5b**)

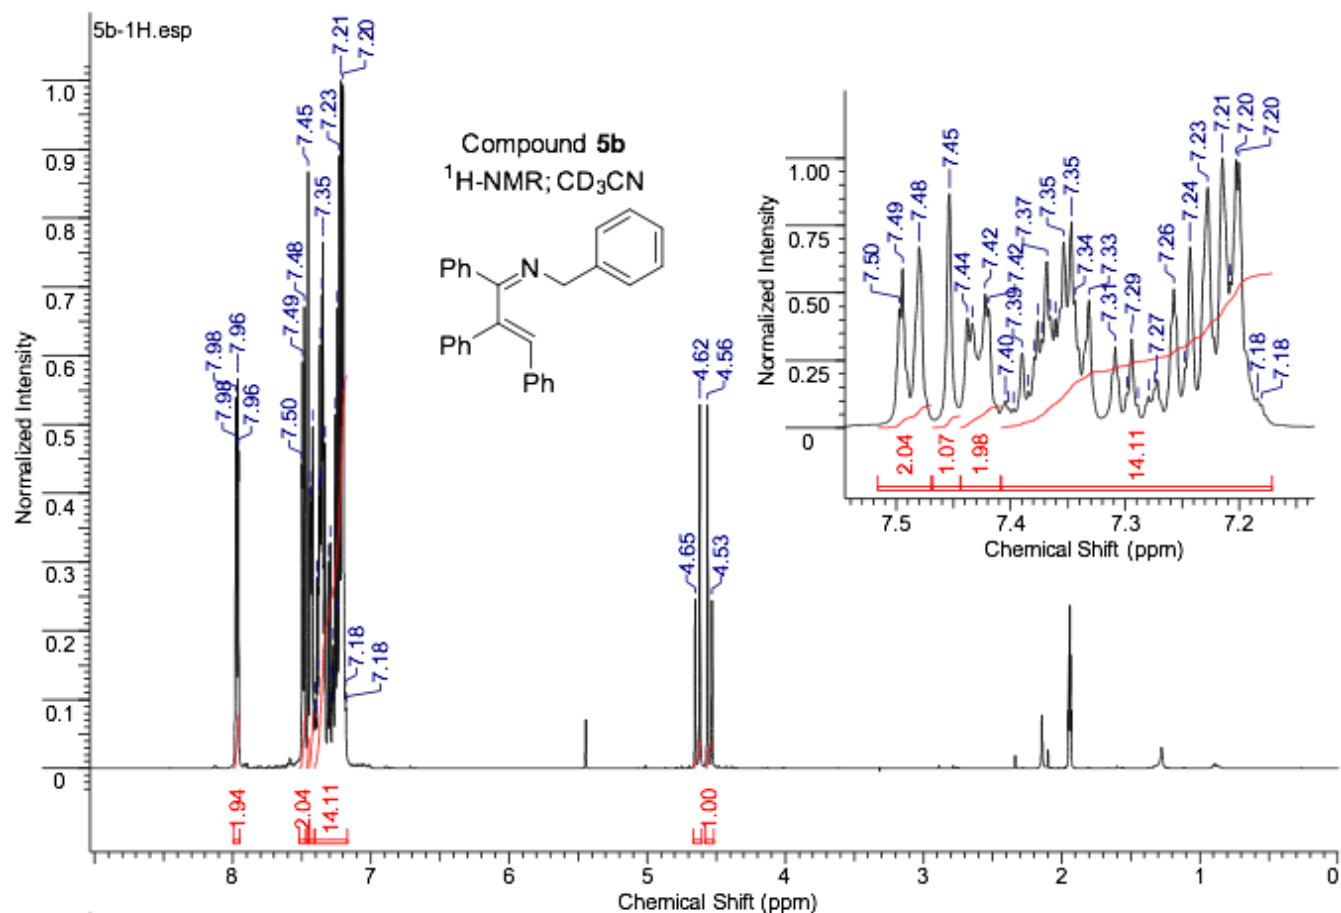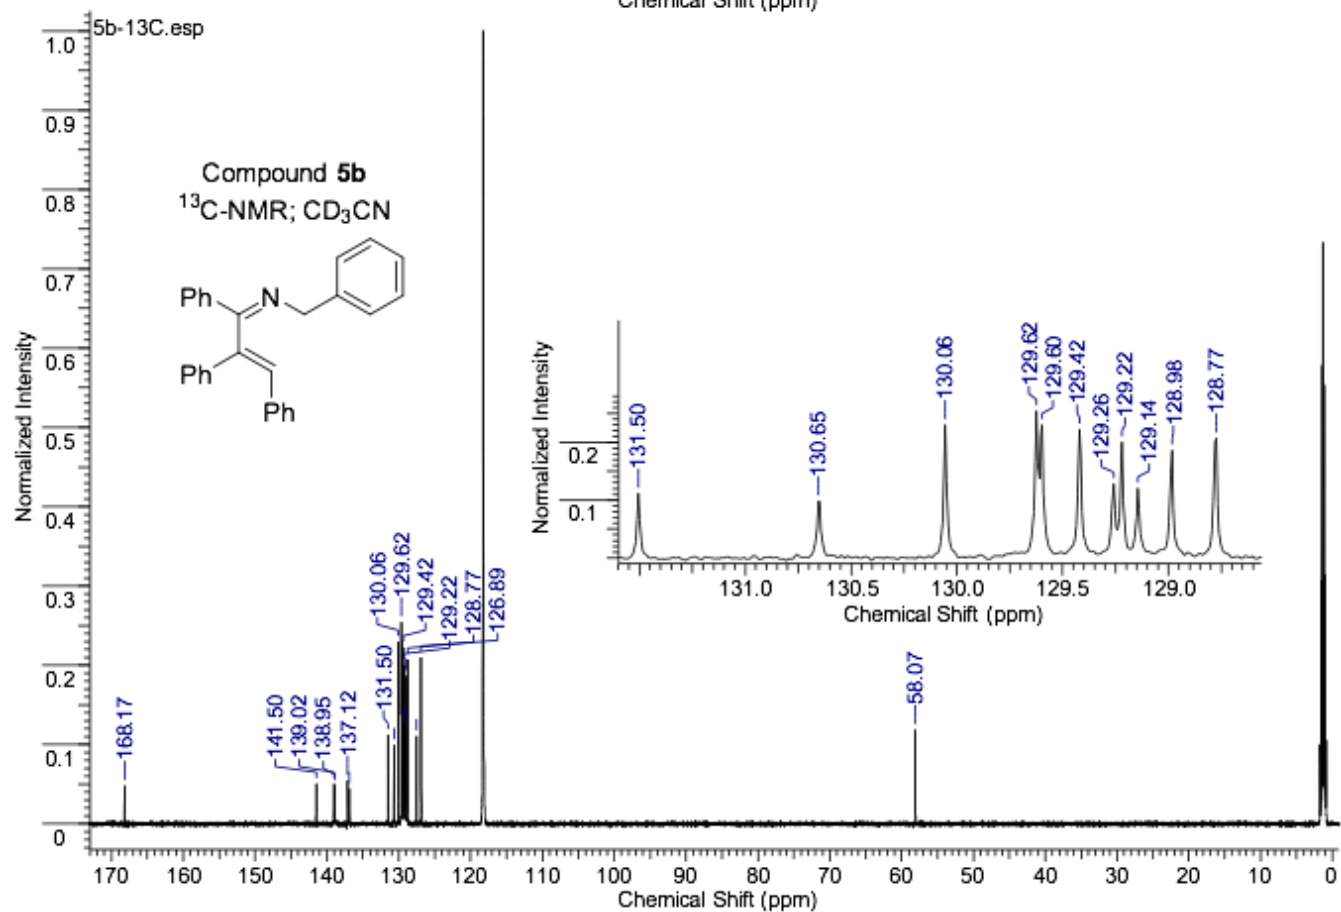

2-Hydroxyethyl-[1,2,3-triphenylprop-2(E)-en-1-ylidene]amine (**5c**)

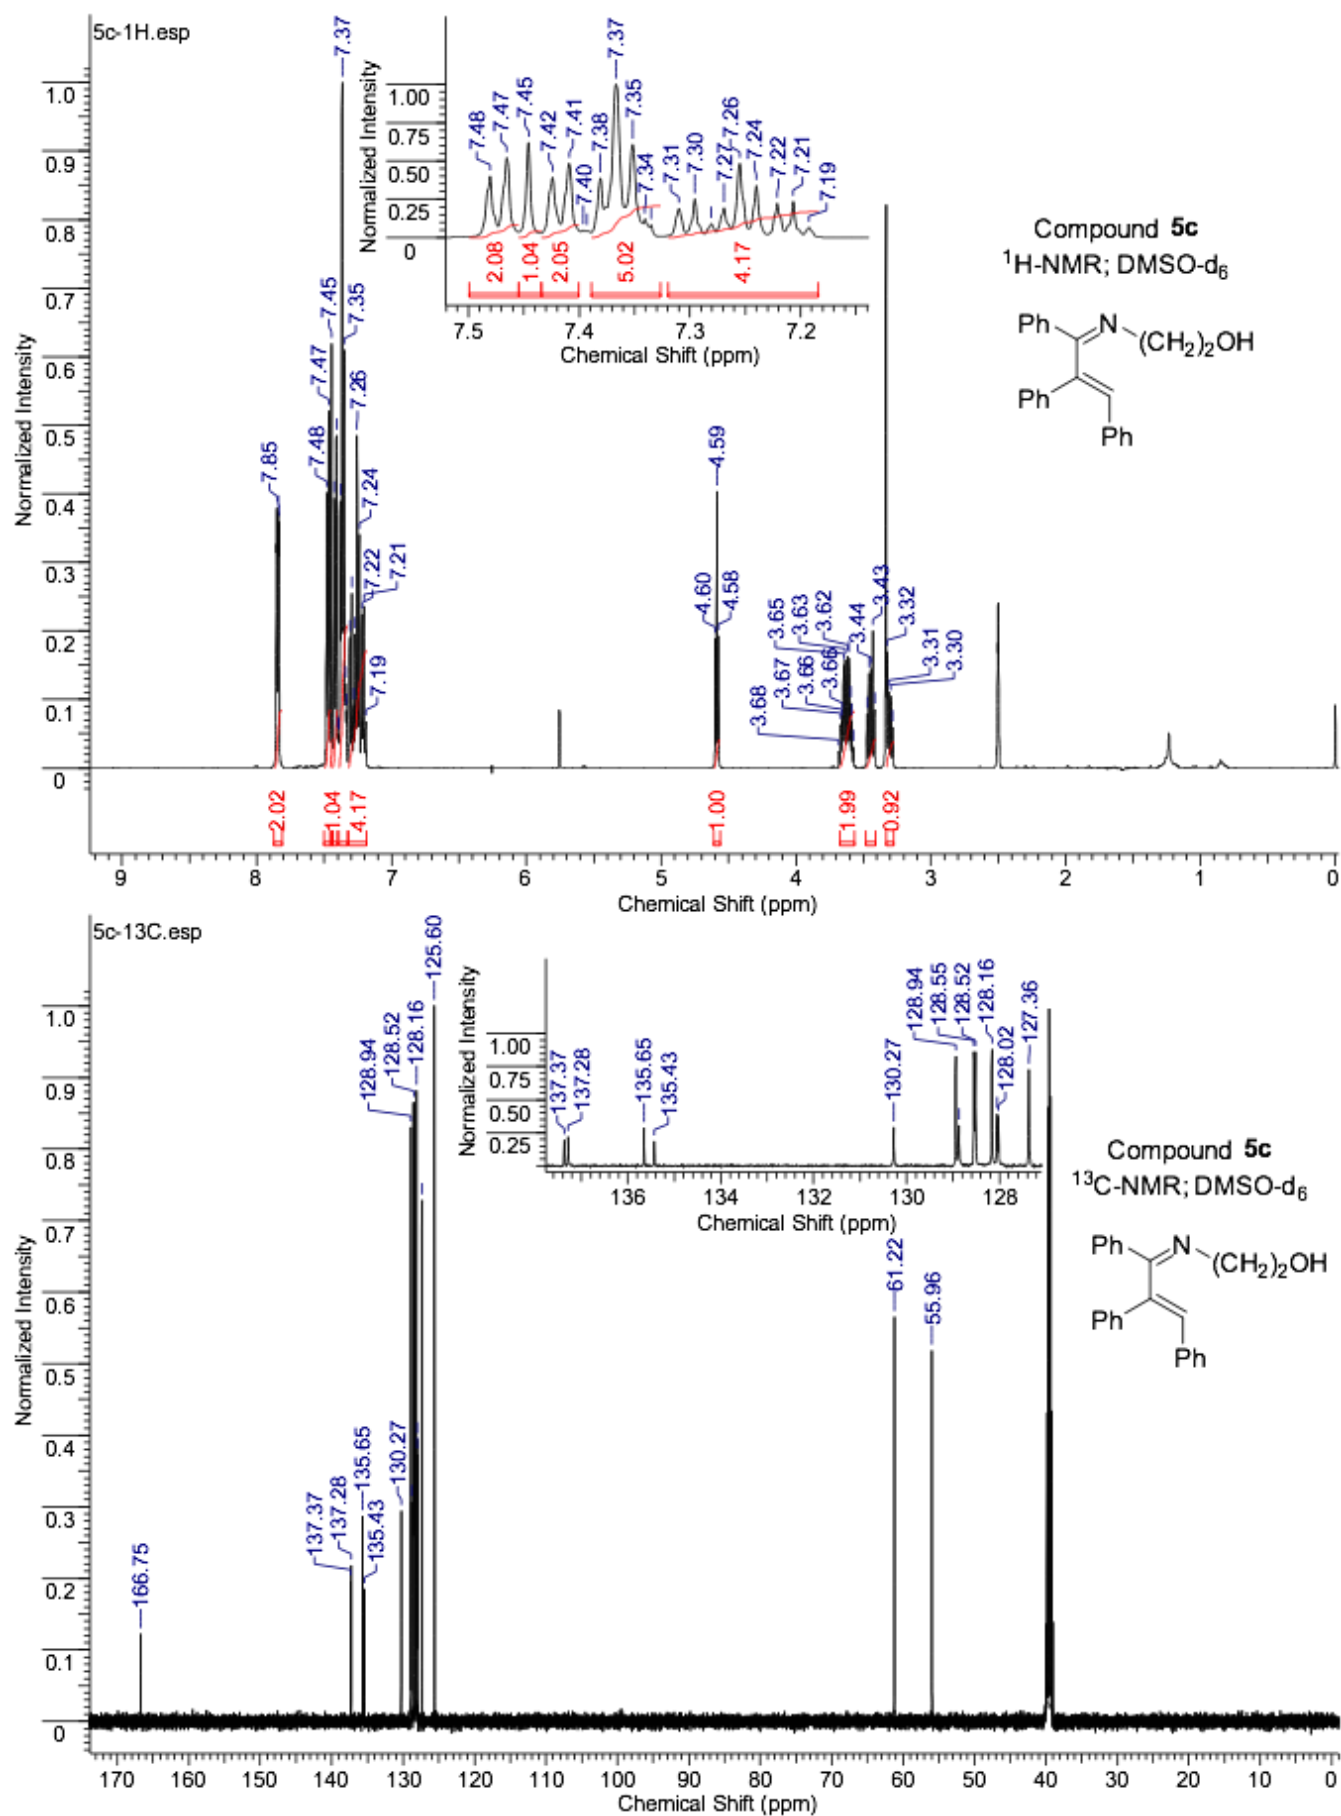

4-Hydroxybutyl-[1,2,3-triphenylprop-2(E)-en-1-ylidene]amine (**5d**)

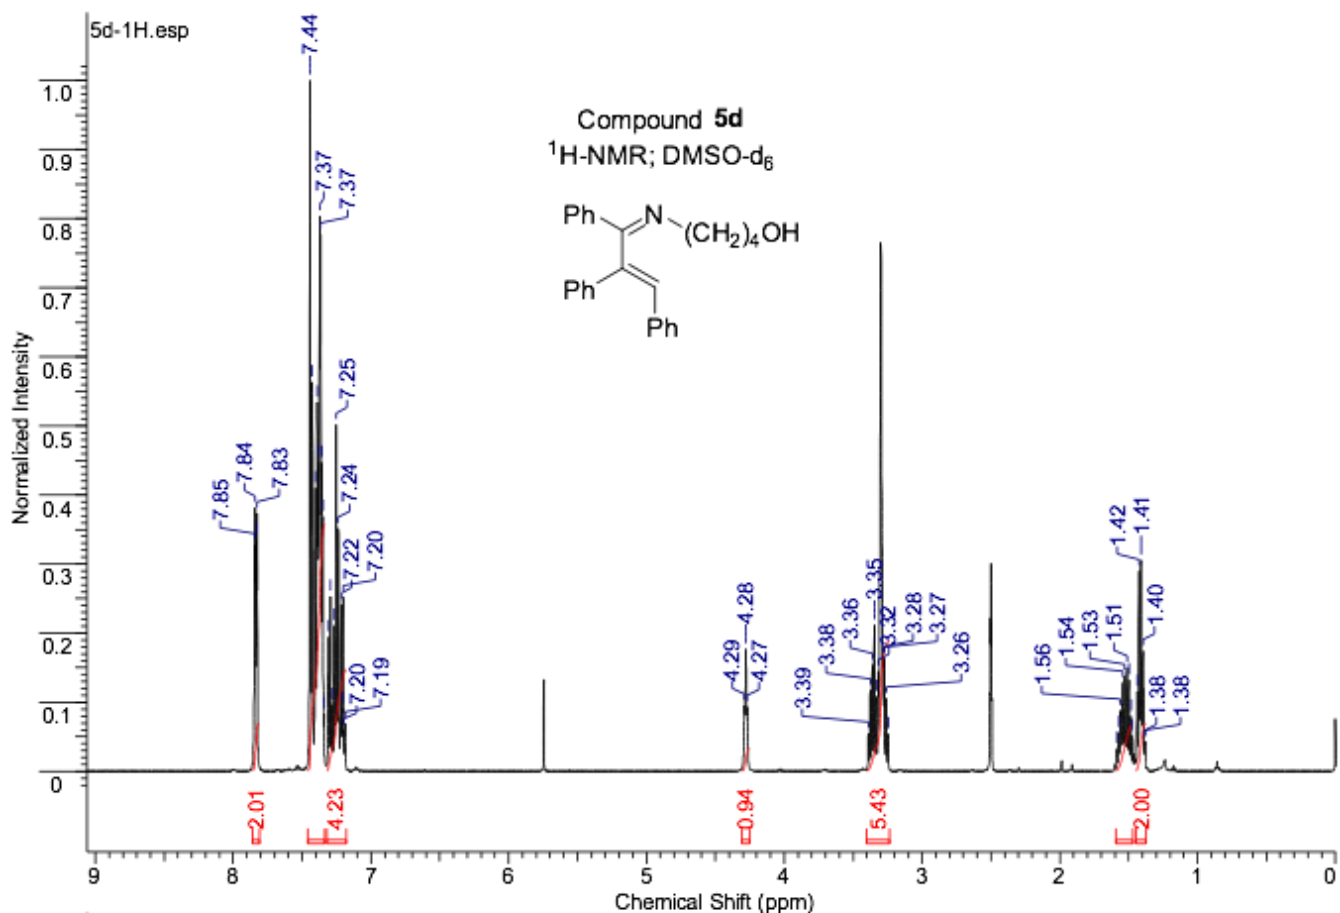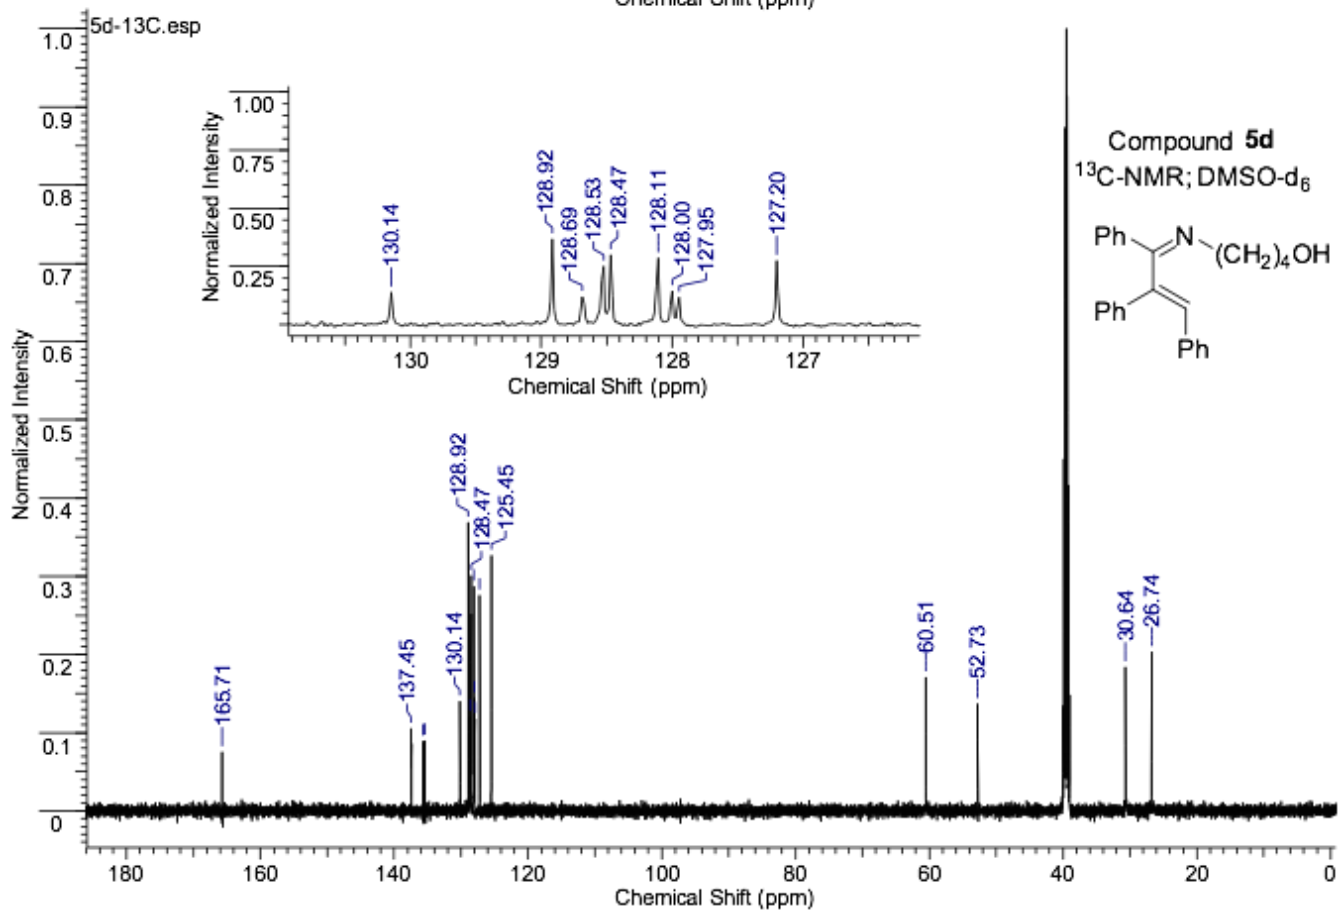

[1,2,3-Triphenylprop-2(E)-en-1-ylidene]malononitrile (**6**)

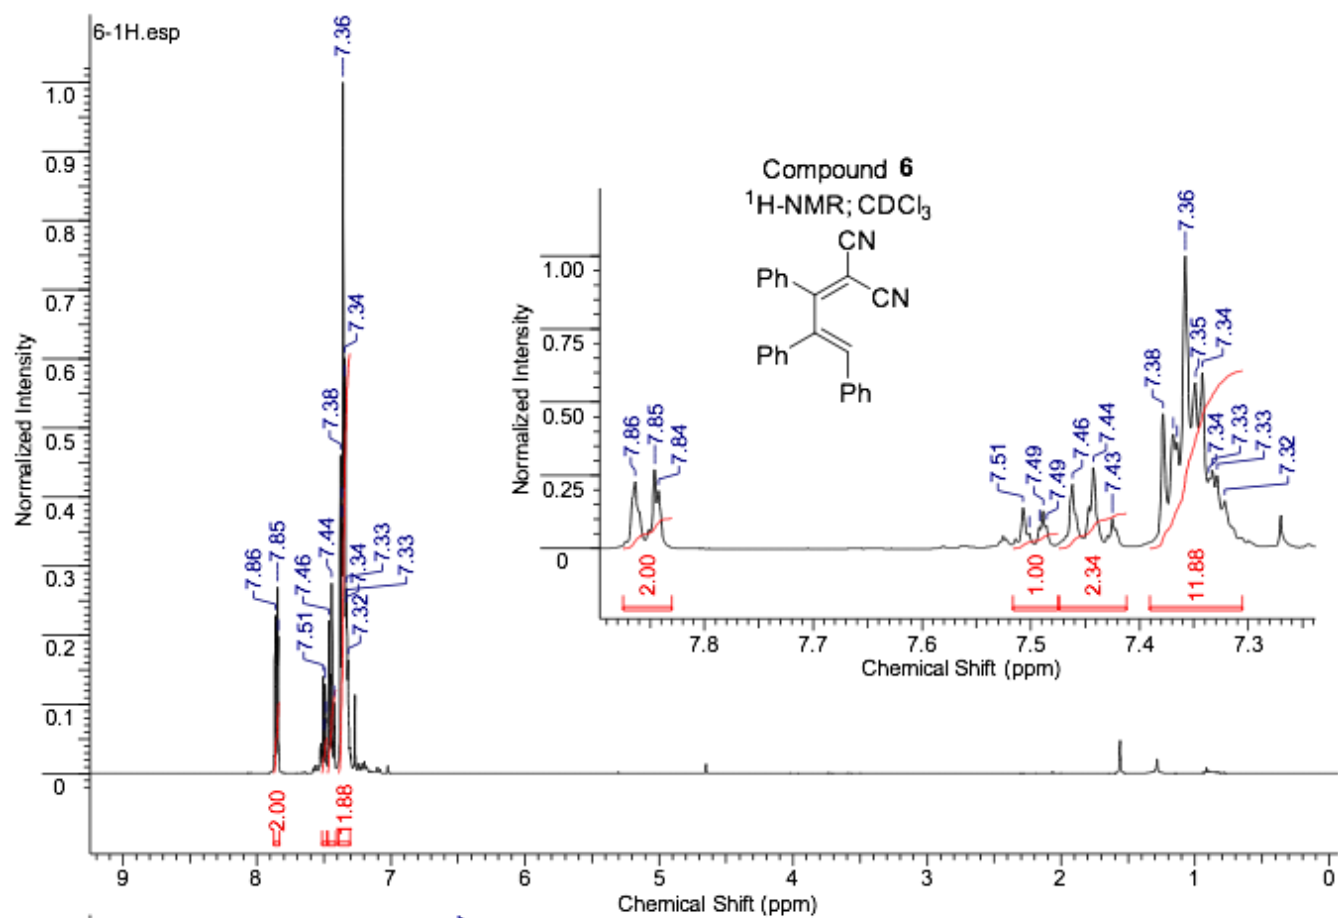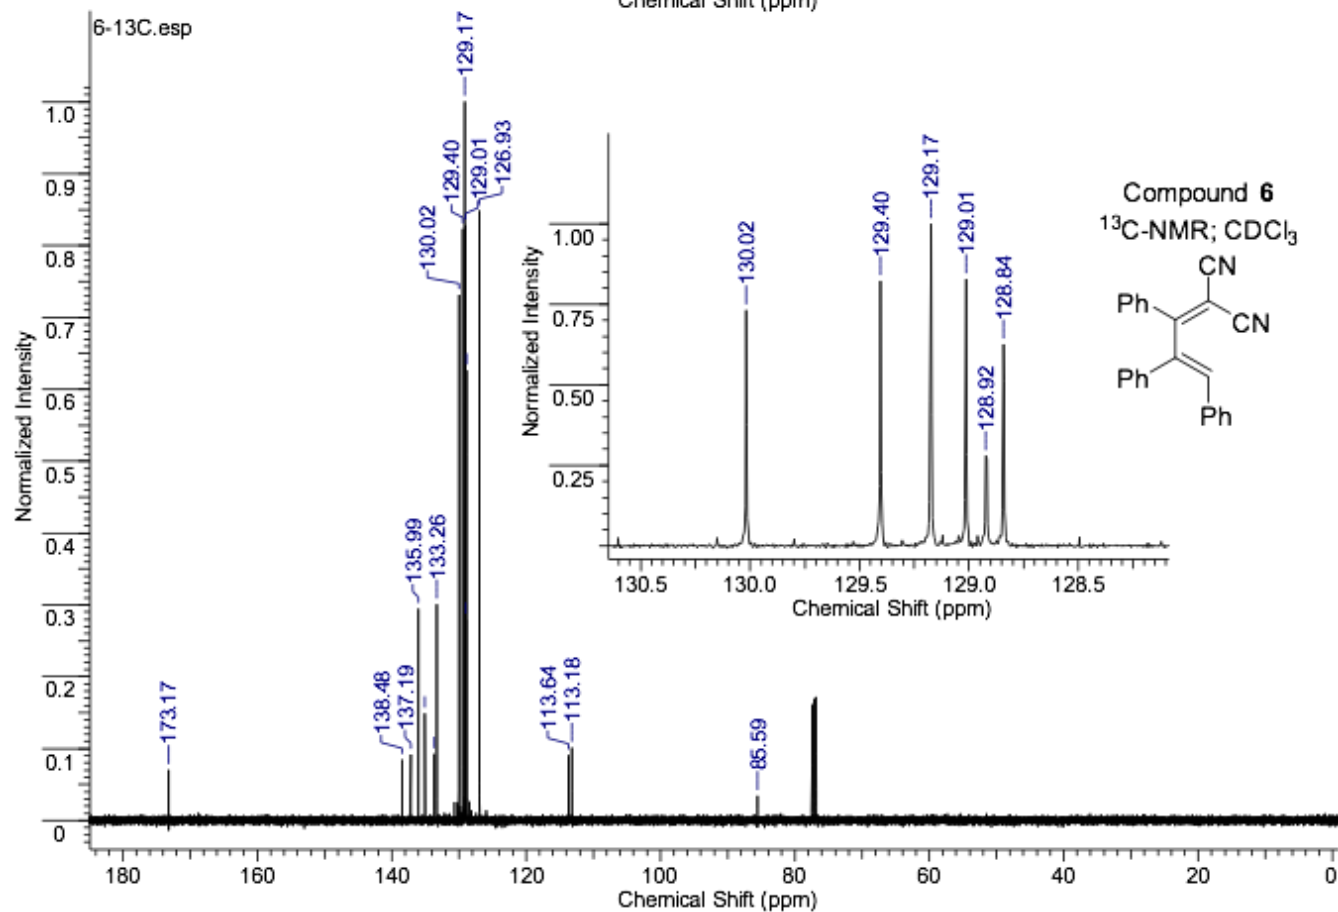

6-(Triphenylcyclopropen-3-ylthio)hexanoic acid, N-oxy succinimide ester (**7**)

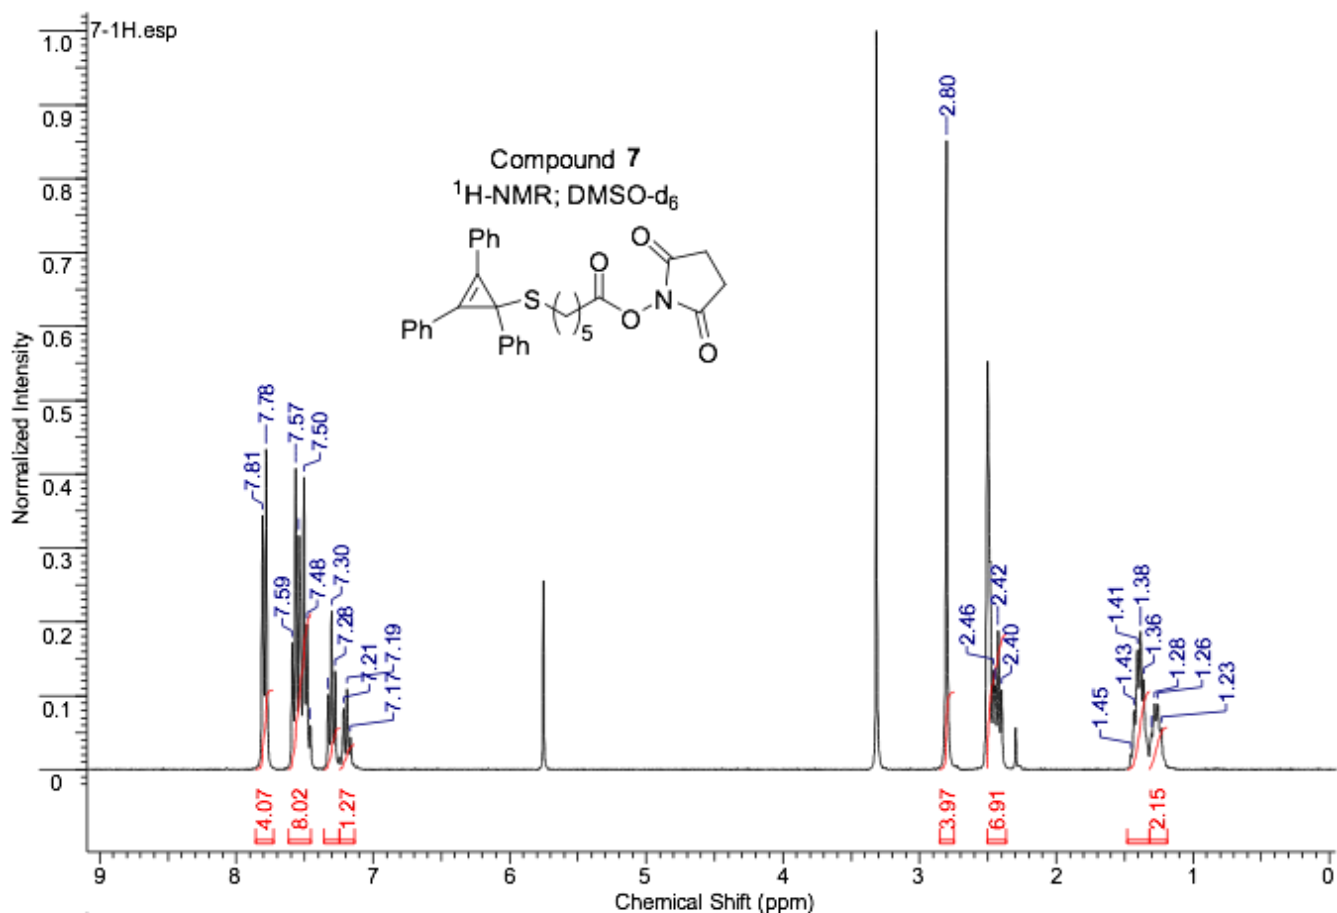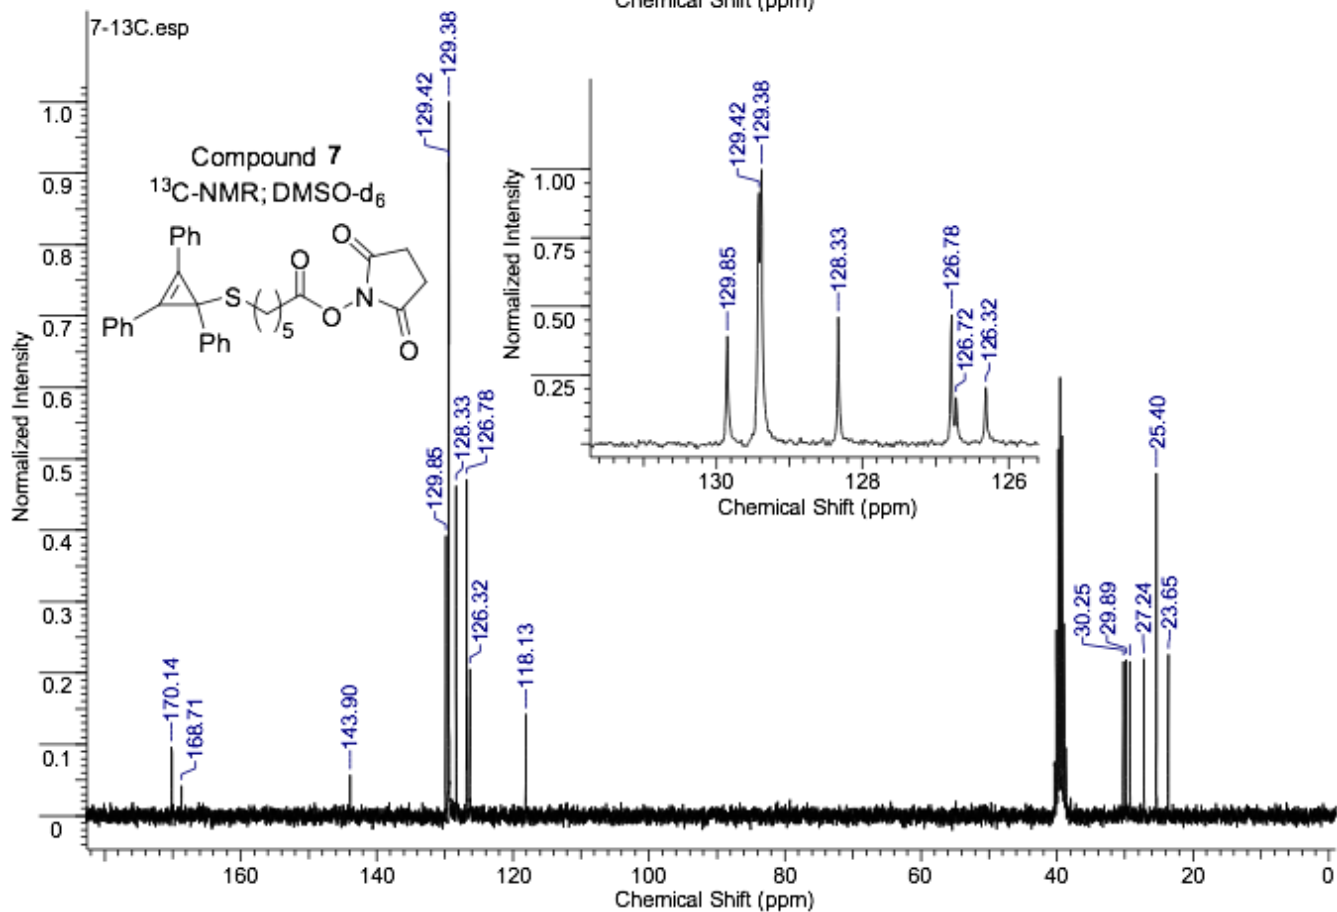

$^1\text{H}$ - $^{13}\text{C}$  HSQC NMR of compound **5d** (DMSO- $d_6$ )

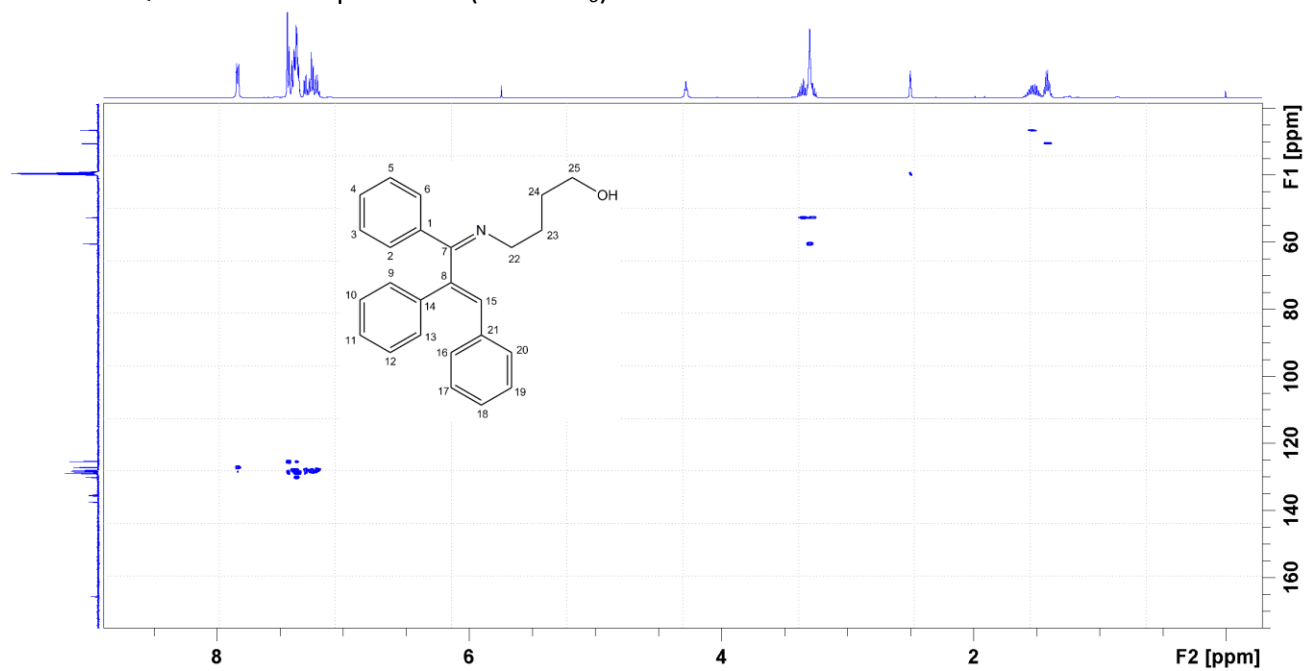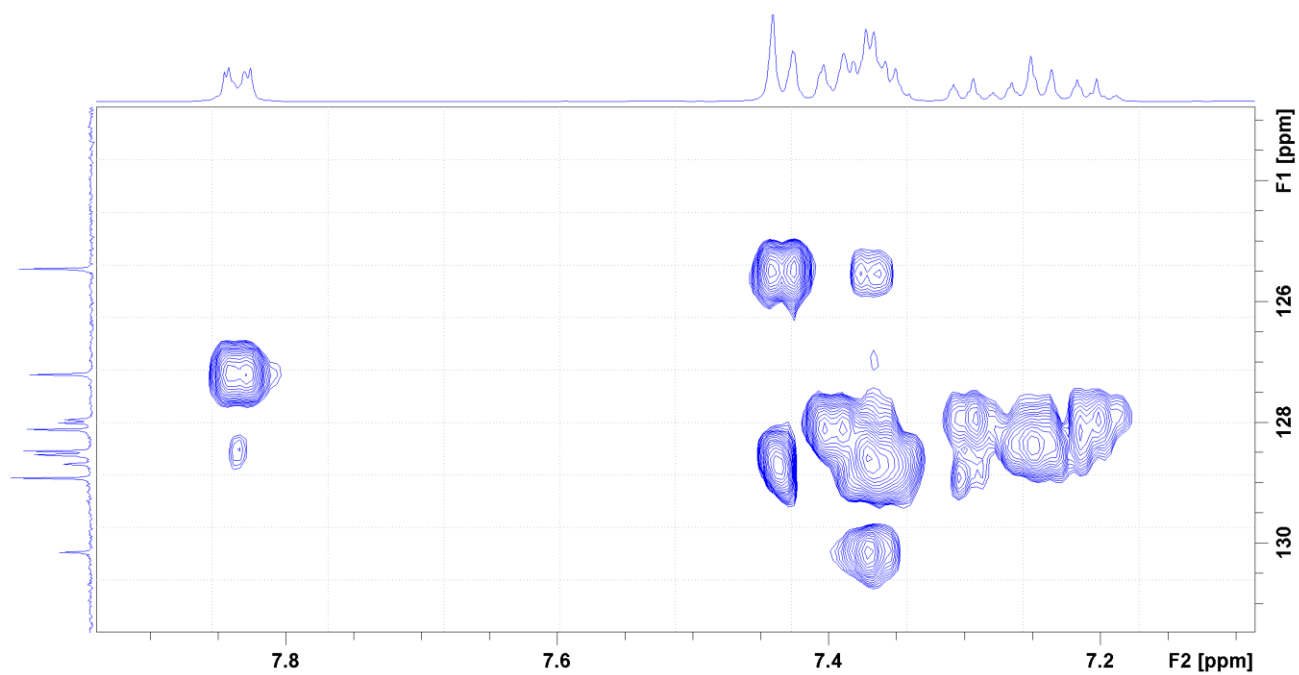

$^1\text{H}$ - $^{13}\text{C}$  HMBC NMR of compound **5d** (DMSO- $d_6$ )

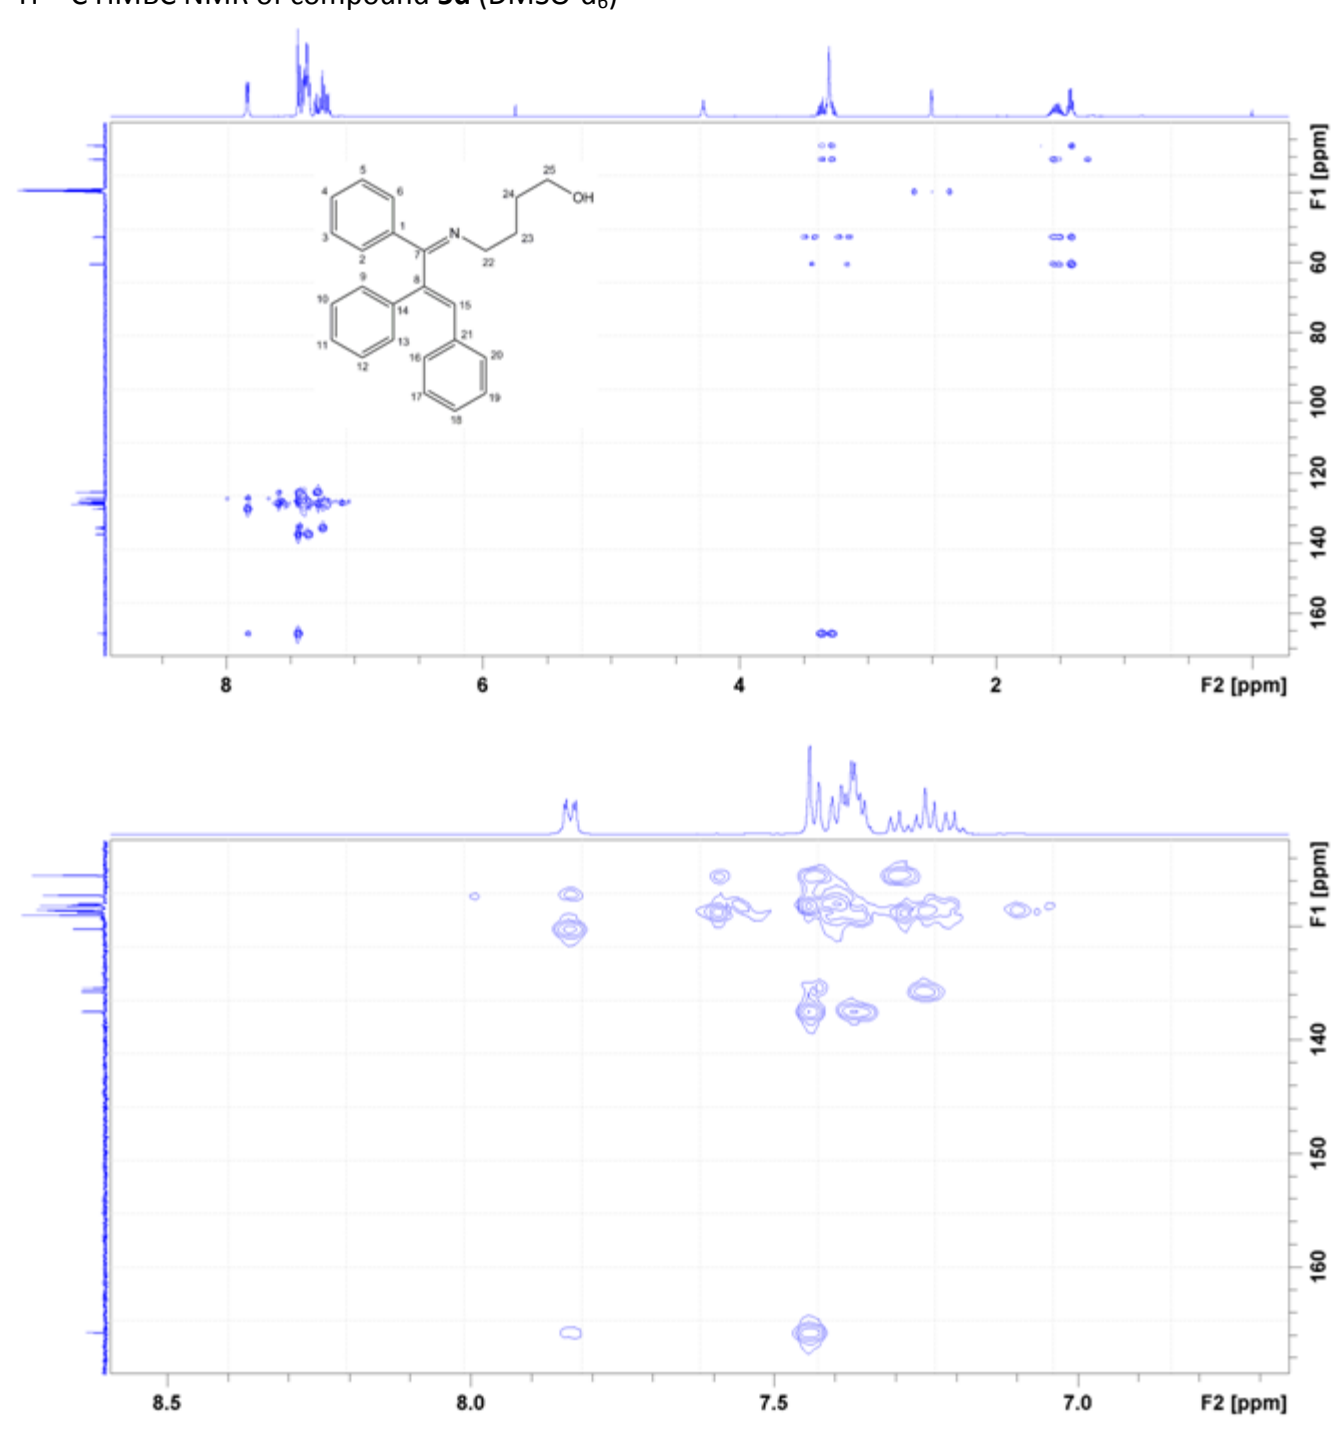

Supplement: c5an02642c1.pdf [file c5an02642c1.pdf]
